1 **Use of an individual-based model of pneumococcal**  
2 **carriage for planning a randomized trial of a vaccine**

3 Francisco Y. Cai<sup>1,2\*</sup>, Thomas Fussell<sup>1</sup>, Sarah E. Cobey<sup>3</sup>, Marc Lipsitch<sup>1,2</sup>

4 <sup>1</sup> Department of Epidemiology, Harvard T. H. Chan School of Public Health, Boston, MA 02115, USA

5 <sup>2</sup> Center for Communicable Disease Dynamics, Harvard T. H. Chan School of Public Health, Boston, MA 02115,  
6 USA

7 <sup>3</sup> Department of Ecology and Evolution, University of Chicago, Chicago, IL 60637

8 \* Corresponding author

9 Email: francisco@mail.harvard.edu

10 Short Title: Use of a pneumococcal carriage model for planning a vaccine trial

11

## 12 **Abstract**

13 For encapsulated bacteria such as *Streptococcus pneumoniae*, asymptomatic carriage is  
14 more common and longer in duration than disease, and hence is often a more convenient  
15 endpoint for clinical trials of vaccines against these bacteria. However, using a carriage  
16 endpoint entails specific challenges. Carriage is almost always measured as prevalence,  
17 whereas the vaccine may act by reducing incidence or duration. Thus, to determine sample  
18 size requirements, its impact on prevalence must first be estimated. The relationship between  
19 incidence and prevalence (or duration and prevalence) is convex, saturating at 100%  
20 prevalence. For this reason, the proportional effect of a vaccine on prevalence is typically less  
21 than its proportional effect on incidence or duration. This relationship is further complicated in  
22 the presence of multiple pathogen strains. In addition, host immunity to carriage accumulates  
23 rapidly with frequent exposures in early years of life, creating potentially complex interactions  
24 with the vaccine's effect. We conducted a simulation study to predict the impact of an  
25 inactivated whole cell pneumococcal vaccine—believed to reduce carriage duration—on  
26 carriage prevalence in different age groups and trial settings. We used an individual-based  
27 model of pneumococcal carriage that incorporates relevant immunological processes, both  
28 vaccine-induced and naturally acquired. Our simulations showed that for a wide range of  
29 vaccine efficacies, sampling time and age at vaccination are important determinants of  
30 sample size. There is a window of favorable sampling times during which the required sample  
31 size is relatively low, and this window is prolonged with a younger age at vaccination, and in a  
32 trial setting with lower transmission intensity. These results illustrate the ability of simulation  
33 studies to inform the planning of vaccine trials with carriage endpoints, and the methods we

34 present here can be applied to trials evaluating other pneumococcal vaccine candidates or  
35 comparing alternative dosing schedules for the existing conjugate vaccines.

36

## 37 **Author Summary**

38 *Streptococcus pneumoniae*, a bacterium carried in the nasopharynx of many healthy  
39 people, is also a leading cause of bacterial pneumonia, sepsis, and ear infections in children  
40 aged five years and younger. Vaccines targeting select strains of *S. pneumoniae* have been  
41 effective, and the development of new vaccines, particularly those that target all strains, can  
42 further lower disease burden. For clinical trials of these vaccines, the number of study  
43 participants needed depends on the expected effect of the vaccine on a conveniently  
44 measured outcome: asymptomatic carriage. The most economical way to test a vaccine for its  
45 effect on carriage is by measuring prevalence at a specific time, and comparing vaccinated to  
46 unvaccinated participants. The relationship between incidence (or duration) and prevalence is  
47 complex, and changes with time as children develop natural immunity. We explored this  
48 relationship using a mathematical model. Given a vaccine efficacy, our computer simulations  
49 predict that fewer study participants are needed if they are vaccinated at a younger age,  
50 taken from a population with intermediate levels of transmission, and sampled for carriage at  
51 a certain time window: 9 to 18 months after vaccination. Our study illustrates how simulation  
52 studies can help plan more efficient vaccine trials.

53

## 54 **Introduction**

55 For encapsulated bacteria such as *Streptococcus pneumoniae* [1], *Haemophilus*  
56 *influenzae* [2], and *Neisseria meningitidis* [3], asymptomatic carriage in the human upper  
57 respiratory tract is a precursor to mucosal or invasive disease. The population of bacteria in  
58 the upper respiratory tract, which may be sampled in the oropharynx or nasopharynx, is also  
59 the primary or sole source of transmission of these bacteria. Because carriage is far more  
60 common and typically longer in duration than disease with these bacteria, it is often a more  
61 convenient endpoint for clinical trials of vaccines against them. If a vaccine can prevent or  
62 terminate carriage, then it is likely to reduce both the risk of disease and the opportunities for  
63 transmission, leading to herd immunity effects. Many of the current generation of vaccines  
64 against these organisms, made from their capsular polysaccharides chemically conjugated to  
65 a protein carrier (conjugate vaccines), have been evaluated in randomized controlled trials  
66 (RCTs) where carriage was the primary endpoint [4-10], and the case for carriage as an  
67 endpoint in vaccine licensure has been put forth by an international consortium [11]. Carriage  
68 endpoints have also been used for RCTs of other vaccines against encapsulated bacteria,  
69 such as the protein-based vaccine designed to protect against group B meningococci [12].

70 While the use of carriage as an endpoint in an RCT is often convenient and offers the  
71 possibility of smaller sample sizes than disease endpoints, it presents added complexities.  
72 Carriage is almost always measured as prevalence (whether the target organism is present at  
73 a particular time) rather than as incidence (the rate at which individuals acquire the organism),  
74 the more traditional endpoint in vaccine trials. For vaccines such as conjugate vaccines that  
75 are thought to act directly on vaccinated persons by reducing the incidence of acquiring  
76 colonization, the proportional reduction in prevalence due to a vaccine will in general be

77 smaller than the proportional reduction in incidence it causes [13], because prevalence  
78 increases less than linearly with incidence. Under certain assumptions, the estimated impact  
79 on prevalence can be converted into an estimate of the impact on incidence [13], though this  
80 becomes more complex when there are multiple serotypes targeted by the vaccine [14]. At a  
81 practical level, decisions must be made about when to sample the carriage population to  
82 estimate efficacy, with the goal of observing the largest effect possible (to reduce sample  
83 size) and also of being able to estimate a meaningful efficacy parameter [15]. Moreover,  
84 immunity to carriage of *S. pneumoniae* (also called pneumococci, the species on which this  
85 paper and the remainder of this introduction will focus) likely involves at least two different  
86 parts of the immune system: antibodies that act in a serotype-specific fashion to reduce the  
87 risk of acquisition [16] and T-helper cells that act in a serotype-independent manner to reduce  
88 the duration of a carriage episode [17]. Both of these forms of immunity are imperfect: even  
89 after multiple exposures to pneumococci, a human can acquire colonization and will not clear  
90 it immediately [16,18,19]. Vaccines typically augment or hasten the acquisition of immunity,  
91 but vaccine-induced immunity against carriage is also only partially effective [13]. In a vaccine  
92 trial conducted in infants or toddlers, participants in both the vaccine group and the control  
93 group will be repeatedly challenged by exposure to pneumococci. Through the experience of  
94 acquiring and clearing colonization, these individuals will develop immune responses that  
95 reduce their rate of acquisition on exposure and increase the rate at which they clear the  
96 colonization episode [16,20]. Further complexity arises from the fact that individuals may be  
97 colonized simultaneously with multiple strains of pneumococci [21-23], some of which may be  
98 undetected at sampling time and not all of which may be affected by the vaccine. Given these  
99 complexities, design of an RCT for a new vaccine involves challenging questions of choosing

100 the best population and inclusion criteria to improve the chances of seeing a real effect of the  
101 vaccine, choosing at what time after vaccination to measure carriage, and estimating power  
102 and sample size requirements.

103 Mathematical transmission modeling [15] and simulations [24-26] have been used to  
104 assist in the design of intervention trials for infectious diseases. These approaches have been  
105 needed, and useful, because standard assumptions about the magnitude of effect size and  
106 predictable event rates in controls are often not met in the setting of a transmissible pathogen,  
107 particularly when accounting for complexities like those mentioned above.

108 An inactivated whole cell pneumococcal (wSP) vaccine has recently been manufactured  
109 under Good Manufacturing Practices [27] and has been employed in dose-finding,  
110 immunogenicity, and safety studies in Kenyan adults and toddlers (clinicaltrials.gov  
111 NCT02097472) [28]. Although not powered for efficacy evaluation, this study was extended to  
112 evaluate nasopharyngeal carriage in toddlers participating in the trial. Based on murine data,  
113 it is believed that the primary impact of such a vaccine is to hasten the development of T-cell-  
114 mediated immunity to colonization, thereby reducing the duration of carriage episodes [17,29].  
115 To aid in evaluating the results of this study and in planning future, larger studies, we  
116 undertook simulation modeling of such a trial in different age groups and settings to answer  
117 several questions:

- 118 1. What is the relationship between the amount of immune enhancement such a vaccine  
119 produces and the size of the effect on carriage prevalence in a setting similar to the  
120 Kenyan trial?
- 121 2. How does this relationship depend on the age of the trial participants (which affects  
122 their level of immunity at baseline, as well as their exposure to transmission during the

- 123 trial), and on the intensity of transmission in the population (which affects the rate at  
124 which immunity develops in both vaccine recipients and controls)?
- 125 3. What are the implications for the sample size required to detect a particular effect  
126 size?
- 127 4. Which choice of setting, age group, and time from vaccination to carriage  
128 measurement will be most powerful in detecting various levels of vaccine impact on  
129 hastening immune development?

## 130 **Results**

### 131 **Sampling time and participant age strongly influence sample size**

132 Our simulation study was based on a published individual-based model of pneumococcal  
133 transmission that incorporates many of the complexities described above [30]. To this model,  
134 we added the ability to simulate vaccine trials, and implemented an algorithm to fit parameters  
135 to carriage prevalence data. The wSP vaccine was modeled as accelerating the exposure-  
136 dependent development of non-serotype-specific immunity against carriage duration, i.e.  
137 vaccination was immunologically equivalent to having cleared more colonizations. Three  
138 possible vaccine efficacies were considered: 3, 5, or 10 “colonization equivalents” (“c.e.”),  
139 which correspond, respectively, to an additional 26%, 39%, or 63% reduction in carriage  
140 duration. We assumed a minimum carriage duration of 20 days, and so reductions in duration  
141 affect the duration of carriage beyond the first 20 days. Trial participants in the model were  
142 vaccinated once, either as infants, at 60 days of age, or as toddlers, at 360 days, and the  
143 vaccine was assumed to be effective immediately upon receipt. Simulated trials took place in



144 two settings that differed in their transmission intensity: the higher transmission setting had an  
145 under-five carriage prevalence of 66%; the lower transmission setting, 55%.

146 For the higher transmission setting, we ran 50 simulations of the vaccine trial using  
147 different random seeds and recorded the carriage prevalence every month (defined as 30  
148 days), starting from birth to 24 months after vaccination (**Fig 1**). For both infants and toddlers,  
149 all vaccine efficacies led to reductions in prevalence throughout the follow-up period. Higher  
150 efficacies resulted in greater reductions in carriage. However, that marginal benefit attenuated  
151 with time as both controls and vaccinees acquired more natural immunity from carriage  
152 episodes. Similar patterns were observed in the toddler trials, but with smaller reductions in  
153 prevalence (**Fig 2A-C**).

154

155 **Fig 1. Age-specific carriage prevalences from representative simulation runs. (A)** Carriage prevalences,  
156 sampled every month starting from birth, is shown for three arms – control (black), those vaccinated as infants  
157 (blue), and those vaccinated as toddlers (purple) – in a simulated trial in the higher transmission setting. Only the  
158 10 colonization equivalent (c.e.) wSP vaccine efficacy is presented here. On the x-axis, two arrows indicate the  
159 age at which the vaccine was administered for the vaccinated arms. **(B)** Similar to (A), but for a simulated trial in  
160 the lower transmission setting.

161

162 **Fig 2. Prevalence and sample size over the follow-up period in the higher transmission setting.** Panels  
163 are organized column-wise by vaccine efficacy: 3 colonization equivalents (c.e.), or 26% reduction in carriage  
164 duration (A, D); 5 c.e., or 39% (B, E); and 10 c.e., or 63% (C, F). Within each panel, results are presented  
165 separately for infants (blue) and toddlers (purple). **(A-C)** The joint kernel density estimate (see Methods) of the  
166 control and vaccine arm prevalences at each sampling time (every 3 months until 24 months post-vaccination) is  
167 shown as a contour map truncated by the convex hull of the simulated points, with the median values marked by  
168 a cross. These crosses are connected chronologically, and those corresponding to 0, 12, and 24 months post-  
169 vaccination are labeled. The dashed line indicates equal prevalences in the two arms. **(D-F)** The kernel density  
170 estimate of the total sample size (combined size of both samples) needed to detect a difference between control  
171 and vaccine arm prevalences at each sampling time (assuming 80% power, 5% type I error rate, balanced  
172 arms). The horizontal bars in each violin plot indicate the minimum, median, and maximum values across all

173 simulations. In (D), the maximum sample sizes for infants and for toddlers at 3 months post-vaccination are  
174 greater than one million and not shown.

175

176 For the infants, the prevalence in the control and vaccine arms followed non-monotonic  
177 trajectories over the course of the follow-up period. In the infants, the median prevalence in  
178 the control arms started at 74% at 2 months of age, peaked at 91% at 8 months of age, and  
179 then declined (**Fig 2A-C, Fig 1A**). The timing of the peak is consistent with previously  
180 reported data from Kilifi, Kenya [31]. In the vaccinated infants, the median prevalence peaked  
181 at the same time, at 8 months of age for the 3 c.e. vaccine efficacy, or slightly earlier, at 5  
182 months of age for the 5 c.e. and 10 c.e. wSP vaccine efficacies (**Fig 2A-C, blue**). For the  
183 toddlers, who are vaccinated later in life at 12 months of age, the age-specific prevalence in  
184 both the control and vaccine arms steadily declined across the 24-month follow-up period (**Fig**  
185 **2A-C, purple**).

186 From the joint trajectory of the control and vaccine arm prevalence over the follow-up  
187 period, we determined how the sample size required for a two-sample test of equal proportion  
188 varied with sampling time. We assumed a 5% type I error probability, 80% power, and  
189 balanced arms, and use the term “sample size” to refer to the combined size of both arms. In  
190 infants, for all vaccine efficacies, the median sample size decreased dramatically—almost  
191 ten-fold or more—in the period 3 to 9 months post-vaccination, plateaued, and then started  
192 increasing around 18 months post-vaccination. In toddlers, the median sample size over time  
193 was also U-shaped, reaching a minimum at 9 months post-vaccination before increasing (**Fig**  
194 **2D-F, purple**). At virtually all sampling times and for all vaccine efficacies, the median sample  
195 size was larger in the toddler trials than in the infant trials (**Fig 2D-F**).

## 196 Lower transmission intensity lengthens window of favorable sampling times

197 To examine the impact of transmission intensity in the population on carriage prevalence  
198 in the trial, we also ran 50 simulations of the vaccine trial in the lower transmission setting. As  
199 in the higher transmission setting, all vaccine efficacies resulted in reductions in carriage  
200 prevalence at all sampling times. The prevalence peak previously observed in infants was  
201 delayed, due to the slower acquisition of non-serotype-specific immunity in a lower  
202 transmission setting (**Fig 1**). Thus, the prevalence trajectories in controls and vaccinees  
203 followed non-monotonic trajectories in both infants and toddlers (**Fig 3A-C**). In the infant  
204 arms, the kink in the prevalence trajectory between 9 and 12 months post-vaccination was  
205 due to the change in age-specific contact patterns as the participants aged into the next age  
206 group (**Fig 3A-C, Table S1**).

207

208 **Fig 3. Prevalence and sample size over the follow-up period in the lower transmission setting.** Panels are  
209 organized column-wise by wSP vaccine efficacy: 3 colonization equivalents (c.e.), or 26% reduction in carriage  
210 duration (A, D); 5 c.e., or 39% (B, E); and 10 c.e., or 63% (C, F). Within each panel, results are presented  
211 separately for infants (blue) and toddlers (purple). (**A-C**) The joint kernel density estimate (see Methods) of the  
212 control and vaccine arm prevalences at each sampling time (every 3 months until 24 months post-vaccination) is  
213 shown as a contour map truncated by the convex hull of the simulated points, with the median values marked by  
214 a cross. These crosses are connected chronologically, and those corresponding to 0, 12, and 24 months post-  
215 vaccination are labeled. The dashed line indicates equal prevalences in the two arms. (**D-F**) The kernel density  
216 estimate of the total sample size (combined size of both samples) needed to detect a difference between control  
217 and vaccine arm prevalences at each sampling time (assuming 80% power, 5% type I error rate, balanced  
218 arms). The horizontal bars in each violin plot indicate the minimum, median, and maximum values across all  
219 simulations. In (D), the maximum sample sizes for infants and for toddlers at 3 months post-vaccination are  
220 greater than one million and not shown.

221

222 As in the higher transmission setting, the total sample size decreased substantially in the  
223 period 3 to 9 months post-vaccination, and reached similar minimums. In the infant arms, the  
224 total sample size remained close to the minimum until the end of the 24-month follow-up  
225 period. In the toddler arms, the median sample size increased slightly near the end of the  
226 follow-up period. However, this rebound was considerably smaller than in the higher  
227 transmission setting, and the median sample size at 24 months post-vaccination was roughly  
228 five- to six-fold smaller. The sample sizes for the infant and toddler arms were more similar  
229 than in the higher transmission setting, particularly for later sampling times (**Fig 3D-F**).

## 230 **Discussion**

231 Using a computational, individual-based transmission model of pneumococcal carriage,  
232 we estimated that a vaccine that enhances the immune response by an amount  
233 corresponding to 3, 5, or 10 carriage episodes could reduce age-specific carriage prevalence  
234 up to 7%, 10%, and 17%, respectively, compared to control in a setting similar to that of the  
235 wSP vaccine trial in Kenya, but that the magnitude of the reduction would depend strongly on  
236 the age at which participants were sampled. We found, however, that larger reductions could  
237 be observed if the same trial were performed in infants, in a lower-transmission setting, or  
238 both. Altogether, this analysis indicated that an infant trial conducted in a lower-transmission  
239 setting for a vaccine simulating 3, 5, or 10 exposures could be adequately powered with fewer  
240 than 800, 330, or 110 participants respectively, if the sampling window were chosen to be 15  
241 to 24 months post-vaccination. Suboptimal choices of setting, age group, and sampling time  
242 could multiply the required sample size by a factor of ten or more.

243 The individual-based computational model [30] on which our work is based was originally  
244 used to explain serotype diversity and explore serotype replacement following the introduction  
245 of conjugate vaccines. With modifications, this model is also well suited to address our  
246 modeling questions, because it incorporates many processes, epidemiological and  
247 immunological, that complicate the relationship between the efficacy of a vaccine believed to  
248 reduce carriage duration but not risk of acquisition, and its effect on carriage prevalence. Our  
249 extensions—an algorithm to fit the model to specific epidemiological settings and the ability to  
250 randomize trial participants to different vaccine interventions—allow this model to be used for  
251 vaccine trial planning.

252 Our simulated vaccine trials show that sampling time and participant age greatly influence  
253 the number of participants needed to detect a protective effect of a vaccine whose effect is  
254 accelerating the development of immunity against carriage duration, as the wSP vaccine and  
255 perhaps other protein-based vaccines targeting carriage are expected to do. Across different  
256 combinations of vaccine efficacies and participant ages, the required sample size reached a  
257 minimum approximately 9 months post-vaccination before rebounding in later months. This  
258 favorable sampling time is consistent with simulation results by Scott et al., who explored  
259 similar questions, but more generally and for vaccines whose primary effect is on acquisition  
260 rather than duration, and using a compartmental transmission model [15]. This timing is also  
261 consistent with what Auranen et al., who explored pneumococcal trial design questions with a  
262 Markov transition model, suggest: waiting at least twice the average carriage duration after  
263 immune response before sampling [32].

264 In our simulations, the U-shaped trajectory of sample size over the follow-up period  
265 indicates a window of favorable sampling times, when the sample size is relatively small as

266 compared to earlier or later. We found that sample sizes are lower, and the favorable window  
267 longer, when trial participants were younger, and when the transmission level was lower. In  
268 these scenarios, natural immunity is weaker initially or develops more slowly, and thus  
269 immune enhancement by the vaccine is more apparent. This intuition is what our simulation  
270 study attempts to quantitate, in terms of sample size, for different trial conditions.

271 Certain model assumptions may affect our conclusions. Our formulation of vaccine  
272 efficacy requires estimating the acquisition rate of exposure-dependent immunity. Direct  
273 estimates of vaccine efficacy against carriage, when they become available, can be used  
274 instead. We assume that the vaccine shortens only future carriage episodes, but not ones  
275 already present at the time of vaccination. Since the intrinsic duration of the fittest serotype is  
276 five months, this assumption would delay the vaccine's effect on carriage prevalence, and  
277 thus, our reported favorable sampling times. This delay would affect infants more than  
278 toddlers, as they are more immunologically naïve and experience longer carriage durations.  
279 Auranen et al., in their study, report that sampling time is determined by the rate of clearance  
280 rather than rate of acquisition, which reinforces the importance of determining whether a  
281 vaccine accelerates the clearance of pre-existing carriage episodes [32]. Another important  
282 assumption is that exposure, rather than age alone, is responsible for the progressive  
283 shortening of carriage episodes as an individual gets older. If immune maturation due to  
284 calendar age, rather than or in addition to increased exposure, actually reduces carriage  
285 duration, then that would bolster the case for younger trial participants. Regardless of age at  
286 vaccination, the favorable sampling windows will likely be shortened as well. Our simulation  
287 framework can be easily updated should future evidence suggest revisiting these  
288 assumptions.

289 In its current form, our current simulation framework is already adaptable enough to  
290 examine a variety of scenarios. The ability to tailor simulations to specific settings is  
291 particularly useful—vaccine trials take place in countries with different age and serotype  
292 distributions, and Phase I/II and Phase III trials of the same vaccine may be conducted in the  
293 different locations. While we present results for a vaccine against carriage duration, we can  
294 also model vaccine protection against acquisition, and specify whether a vaccine effect is  
295 serotype-specific. The analysis presented here can be easily repeated, without changes to  
296 the source code, for trials involving polysaccharide conjugate vaccines, which protect against  
297 acquisition [4] and whose protection is serotype-specific [10], and novel vaccines with both  
298 polysaccharide and protein antigens [33], which may elicit a combination of serotype-specific  
299 and cross-reactive responses against carriage. The general population can also be  
300 vaccinated. Hence, our framework can be used to simulate trials—such as those comparing  
301 dosing schedules—that take place in countries with existing vaccination programs. In addition  
302 to planning future trials, our simulation framework can be used to examine completed trials.  
303 For completed trials with carriage endpoints that have not found a statistically significant  
304 vaccine effect, such as a recent phase II trial of a protein and polysaccharide-based vaccine  
305 in Gambian infants [33], simulation studies such as this can help assess whether inadequate  
306 power is a compelling explanation.

307 The analysis presented in this paper does not consider the effect of vaccination on  
308 carriage density or other factors (apart from duration) that would affect the infectiousness of a  
309 person who is vaccinated yet still becomes colonized. More generally, we do not consider the  
310 impact of vaccination on transmission at all in our simulations: simulated trial participants are  
311 computationally isolated from other hosts to approximate an individually randomized trial in

312 which the participants are a negligible fraction of the population. However, our current  
313 framework can also simulate roll-outs of vaccination programs in the simulated population,  
314 where there is transmission between individuals, thus allowing the indirect effect of  
315 vaccination to be included. Vaccines with direct effects against transmissibility, possibly via  
316 reducing bacterial density in the nasopharynx, can be incorporated into our framework as  
317 well, with minimal modifications to the source code.

## 318 **Methods**

### 319 **Mathematical model**

320 **Pneumococcal transmission dynamic model.** This simulation study was based on a  
321 published individual-based model of pneumococcal carriage that incorporates many of the  
322 complexities relevant to our modeling questions [30]. Briefly, hosts are exposed to and can be  
323 colonized by multiple serotypes through age-specific contact with others. Serotypes differ in  
324 their mean duration of colonization in a naive host (“intrinsic duration”), which ranges from 20  
325 to 150 days [19,20], and in their ability to prevent other strains from colonizing the same host.  
326 These phenotypes are positively correlated—i.e. fitter serotypes have longer intrinsic  
327 durations and are more likely to prevent concurrent colonizations—through their dependence  
328 on a serotype-specific fitness parameter. Hosts acquire immunity through colonizations.  
329 Clearing a colonization results in serotype-specific (anti-capsular) immunity that reduces risk  
330 of acquisition of the same serotype. Each clearance, of any serotype, enhances non-  
331 serotype-specific immunity that reduces the mean duration of carriage episodes.



332 **wSP vaccine effect.** The wSP vaccine was modeled as accelerating the acquisition of  
333 non-serotype-specific immunity that reduces carriage duration. As in Cobey et al. [30], the  
334 duration of a carriage episode is drawn from an exponential distribution with a mean given by

$$335 \quad \mu(s, n_c) = \mu_{\min} + (\mu_s - \mu_{\min}) \exp(-\epsilon n_c), \quad (1)$$

336 where  $s$  is the serotype carried,  $n_c$  is the number of cleared carriage episodes (of any  
337 serotype),  $\mu_{\min}$  is the minimum mean duration, and  $\mu_s$  is the intrinsic duration of serotype  $s$ .

338 The exposure-dependent development of non-serotype-specific immunity is captured in the  
339 exponential decay term in Equation 1. Each cleared colonization is immunizing, but with  
340 diminishing returns, and brings the mean duration closer to the minimum mean duration. For  
341 a vaccinated individual, the mean duration is given by

$$342 \quad \tilde{\mu}(s, n_c) = \mu(s, n_c + n_v), \quad (2)$$

343 where  $n_v$  is a positive constant characterizing the strength of the vaccine effect. Thus, the  
344 wSP vaccine can be thought of as boosting the non-serotype-specific immunity by an  
345 additional  $n_v$  cleared colonizations, and we can express its efficacy in terms of “colonization  
346 equivalents” or “c.e.” We considered three different values of  $n_v$ : 3, 5, and 10. The duration of  
347 each carriage episode was determined at the time of colonization, and hence, the vaccine did  
348 not affect colonizations already present on the day of vaccination. For simplicity, we assumed  
349 that full efficacy is achieved immediately upon receipt of a single dose.

350 **Vaccine trials.** To the original transmission model, we added the ability to simulate  
351 vaccine trials. Each trial arm was characterized by the number of participants, the enrollment  
352 date, and the vaccine and dose schedule used. In our implementation, trial participants were  
353 semi-isolated from the population: their demographics were tracked separately and their

354 colonizations do not contribute to the force of colonization for the main population, but their  
355 exposures and risk of colonization were equivalent to those of the same age in the main  
356 population. This implementation design ensured that their colonization histories remain  
357 representative of participants within the main population, while affording two advantages: 1)  
358 We can have an arbitrarily large number of trial participants without skewing the  
359 epidemiological dynamics of the population, and 2) participants can be “enrolled” simply by  
360 birthing them into the simulation, without skewing the age structure of the population.  
361 Alternatively, we could have achieved these properties by simulating a large enough  
362 population such that the trial participants are a negligible fraction and thus do not create  
363 appreciable herd immunity in the population—the case in most real-world individually-  
364 randomized vaccine trials. However, that approach would have been considerably more  
365 computationally intensive.

366 **Simulations.** Simulations were initiated with hosts of different ages and no colonizations.  
367 The number of hosts was kept constant throughout a simulation. Every simulation was run  
368 first for 50 years to allow the age distribution of the population to stabilize, after which  
369 colonizations were seeded in the population and the simulation was run for another 50 years  
370 to allow the epidemiological dynamics to equilibrate. At this point, the simulated vaccine trial  
371 was initiated. For simplicity, all participants were birthed into the trial on the same calendar  
372 day. To reduce sampling noise, each trial arm had 5000 participants, 100-fold more than the  
373 trial arms in the Kenyan wSP study [28]. The participants were followed for five years and the  
374 carriage prevalence in each trial arm was recorded every 30 days. These carriage  
375 prevalences were then used as “true prevalences” to calculate the sample size needed to  
376 compare between arms, based on a two-sample test for equal proportions and assuming a

377 5% type I error rate, 80% power, and balanced arms [34]. We use “sample size” to refer to the  
378 combined size of both arms. All combinations of vaccine efficacies (3, 5, 10 c.e. and control)  
379 and ages at vaccination (60 and 360 days) were represented in each simulated trial (for a  
380 total of 8 arms), allowing us to control for transmission in the main population when  
381 comparing between arms. For computational speed, the main population was set at 25  
382 thousand individuals. For each parameter set, we conducted 50 simulations runs – enough so  
383 that trends could be distinguished from stochastic variation between simulations, but not too  
384 many as to require an unreasonable amount of computation time. The model was  
385 implemented in C++11 with Boost C++ libraries. Analysis of simulation results was performed  
386 using Python 2.7 and browser-based Jupyter interactive notebooks [35]. Smoothed  
387 distributions were estimated using Gaussian kernel density estimation as implemented in the  
388 SciPy and Matplotlib Python libraries [36,37], and visualized as a violin plots (1-dimensional)  
389 or contour plots (2-dimensional).

## 390 **Parameter choices**

391 We considered two settings that differ in their transmission intensity. The higher  
392 transmission setting was chosen to approximate Kenya, the site of a recent dose-finding and  
393 safety study [28]. The age distribution of simulated hosts was matched to that of Kenya’s  
394 population in 2015 [38], the second year of the study, which ran from April 2014 to December  
395 2015. The age-specific mixing matrix was estimated from a social contact study in Kilifi,  
396 Kenya from 2011-2012 [39] and can be found in **Table S1**. The age structure in the model is  
397 described in more detail in **Text S1**. We fixed the non-serotype-specific immunity acquisition  
398 rate so the simulated age-specific carriage durations are consistent with the age-specific rates  
399 of clearance in Kenyan toddlers estimated by Abdullahi et al. [40] (**Fig S3**). The serotype

400 fitness parameters were fit to serotype-specific carriage prevalences from a cross-sectional  
 401 study in Kilifi from 2006 to 2008 [31], before the introduction of the conjugate vaccine PCV10.  
 402 We chose to fit using only pre-PCV10 data. Trying to reproduce changes in serotype  
 403 distribution due to PCV10 would have introduced additional complications, while being  
 404 unlikely to yield further insight into our modeling questions given that the wSP vaccine is  
 405 expected to act in a serotype-agnostic manner [41]. A mathematical description of the fitting  
 406 algorithm can be found in **Text S2** and the fitted serotype fitness parameters are listed in  
 407 **Table S2**.

408 For the lower transmission setting, we used a smaller overall contact rate, so the  
 409 simulated carriage prevalence at 12 months of age resembles preliminary estimates from a  
 410 study in Indonesia [42], the proposed site for a follow-up wSP vaccine efficacy trial (**Fig S3**).  
 411 To facilitate comparisons between settings, we kept the same age distribution, age-specific  
 412 mixing pattern, and fitness parameters used in the higher transmission setting. A summary of  
 413 the model parameters and their values can be found in **Table 1**.

414 **Table 1. Selected<sup>1</sup> model parameters.**

| Symbol <sup>2</sup>    | Description                                  | Value(s)        | Refs                 |
|------------------------|----------------------------------------------|-----------------|----------------------|
| <b>Demographic</b>     |                                              |                 |                      |
| $N(0)$                 | Number of hosts (in thousands)               | 25              | Main text            |
| -                      | Maximum age (years)                          | 101             | [38], <b>Text S1</b> |
| -                      | Lifespan distribution                        | <b>Fig S1</b>   | [38], <b>Text S1</b> |
| $\alpha$               | Age-specific mixing weights                  | <b>Table S1</b> | [39], <b>Text S1</b> |
| <b>Epidemiological</b> |                                              |                 |                      |
| -                      | Minimum intrinsic duration (days)            | 20              | [20]                 |
| -                      | Maximum intrinsic duration (days)            | 150             | [19]                 |
| $\kappa$               | Minimum carriage duration in any host (days) | 20              | [20]                 |
| $\mu_{\max}$           | Maximum competitive exclusion                | 0.25            | [20]                 |

|                      |                                                    |                               |                |
|----------------------|----------------------------------------------------|-------------------------------|----------------|
| -                    | Serotype fitness parameters                        | <b>Table S2</b>               | <b>Text S2</b> |
| $\epsilon$           | Acquisition rate of non-serotype-specific immunity | 0.1 <sup>#</sup>              | [40]           |
| $\beta$              | Overall contact rate (contacts per day per host)   | 0.1 or 0.13 <sup>&amp;</sup>  | <b>Text S2</b> |
| <b>Vaccine trial</b> |                                                    |                               |                |
| $a_v$                | Age at vaccination (days)                          | 60 or 360                     | Main text      |
| -                    | Vaccine efficacy (colonization equivalents)        | 26%, 39%, or 63% <sup>‡</sup> | Main text      |
| -                    | Number of participants per arm (in thousands)      | 5                             | Main text      |

415 <sup>1</sup> Parameters adequately described in Cobey and Lipsitch’s paper [30] are not repeated here. Parameters in this  
 416 table either have new values, or are newly introduced.

417 <sup>2</sup> The symbol used in Cobey and Lipsitch’s paper [30], or “-” if no symbol was used or if the parameter is new.

418 <sup>#</sup> Chosen such that age-specific carriage duration is consistent with previous clearance rate estimates.

419 <sup>&</sup> Fit to carriage prevalence in Indonesia and Kenya, respectively, and the only parameterization difference  
 420 between the lower and higher transmission settings used in this paper.

421 <sup>‡</sup> Reduction in carriage duration, in addition to that due to natural immunity. Corresponding to the amount of  
 422 immune enhancement from 3, 5, or 10 additional carriage episodes.

## 423 **Sensitivity analyses**

424 To isolate the effect of transmission intensity in our main analyses, we had used the same  
 425 age-specific mixing pattern—based on Kenya contact survey data [39]—in both the higher and  
 426 lower transmission settings. Real-world vaccine trials, however, will take place in the context  
 427 of different mixing patterns, or may be planned in the absence of reliable social contact data.  
 428 To examine the robustness of our findings to the pattern of age-specific mixing, we repeated  
 429 our analyses assuming random mixing between individuals, i.e., equal contact rate for all  
 430 pairs of individuals. We re-fit the model to the observed Kenya carriage survey data [31], and  
 431 ran a set of 50 simulations. With a random mixing pattern, there was a slightly higher carriage  
 432 prevalence in trial participants during the first two years of follow-up. However, the total  
 433 sample sizes, in both magnitude and trend across sampling time, remained similar to those  
 434 from the main analyses (**Fig S4, Fig 2**).

435 Other potential sources of bias were the population and trial arm sizes. In the main  
436 analyses, we chose values that were small enough to allow simulations to finish reasonably  
437 quickly, and reduced the effect of simulation variability by running multiple simulations and  
438 considering sample median. To assess whether the sample median may be biased, we  
439 performed univariate sensitivity analyses of the population and trial arm size. Specifically,  
440 within the higher transmission setting, we varied population size between 10K, 25K, and 50K  
441 individuals (not including trial participants), with the trial arm size fixed at 5K. We also varied  
442 the trial arm size between 2.5K, 5K, or 10K participants, with the population size fixed at 25K.  
443 Note that the middle values, a population size of 25K and a trial arm size of 5K, were the ones  
444 used in the main analyses. Twenty-five simulations were run for each set of parameter  
445 values. Varying the population and varying the trial arm size did not appreciably alter the  
446 sample median of the simulated carriage prevalences (**Fig S5**). Larger population sizes led to  
447 smaller variability between simulations, which is expected given the stochastic nature of  
448 transmission in the model (**Fig S5A, B**). Larger trial arm sizes did not reduce variability,  
449 suggesting that the epidemiological dynamics in the general population are driving the  
450 variability in the trial arm prevalences, at least for the trial arm sizes examined (**Fig S5C, D**).

#### 451 **Code repository**

452 C++11 code for fitting and simulating the individual-based model can be found in the  
453 Github repository linked here: [will include link before publication]

#### 454 **Supporting Information**

455 **Text S1. Model age structure.** Derivation of the lifespan distribution and age-specific contact weights used in  
456 the model.

457 **Text S2. Model fitting algorithm.** Mathematical description of the algorithm used to fit the transmission model  
458 to carriage prevalence data.

459 **Table S1. Age-specific mixing matrix.**

460 **Table S2. Fitted serotype fitness parameters.**

461 **Table S3. Parameters of the fitting algorithm.**

462 **Fig S1. Lifespan distribution.** The lifespan distribution used in all simulations. It is derived by assuming that the  
463 2015 Kenya age distribution [38] is stable, i.e. no population growth. The step-wise nature of the distribution  
464 reflects the five-year intervals in the age distribution data.

465 **Fig S2. Estimation of serotype fitness parameters. (A)** The fitting process for one representative serotype,  
466 6A. The evolving estimate of 6A's fitness parameter (thin line, right y-axis) and 6A's simulated prevalence (gray  
467 dots, left y-axis) is shown over the course of 125 iterations. Lower values of the fitness parameter correspond to  
468 a fitter phenotype. The moving average (thick line,  $n=5$ ) of the simulated prevalences more clearly shows the  
469 trend of the simulated prevalences towards the target prevalence (horizontal dashed line). The light gray shaded  
470 region highlights the last 25 iterations, whose results are considered in (B). **(B)** One method of assessing the  
471 quality of the model fit. The distribution of prevalence errors (simulated minus target prevalence) in the last 25  
472 iterations of the fitting process is shown for the top 25 serotypes (out of 56 total) by target prevalence (ranging  
473 from 9.96% for 19F to 0.53% for 35A). Each distribution is represented by a violin plot labeled by serotype name,  
474 and with horizontal bars marking the minimum, mean, and maximum values.

475 **Fig S3. Age-specific carriage prevalence and duration. (A, B)** Distribution of carriage prevalence in infants,  
476 by 1-month age categories, for the higher (A) and lower (B) transmission settings. **(C, D)** Distribution of carriage  
477 duration in infants and toddlers, by 6-month age categories, for the higher (C) and lower (D) transmission  
478 settings. Distributions are shown as violin plots, with horizontal bars indicating the minimum, median, and  
479 maximum values.

480 **Fig S4. Prevalence and sample size over the follow-up period in the higher transmission setting, without**  
481 **age-structured mixing.** Panels are organized column-wise by wSP vaccine efficacy: 3 colonization equivalents  
482 (c.e.), or 53% reduction in carriage duration (A, D); 5 c.e., or 71% (B, E); and 10 c.e., 92% (C, F). Within each  
483 panel, results are presented separately for infants (blue) and toddlers (purple). **(A-C)** The joint kernel density  
484 estimate (see Methods) of the control and vaccine arm prevalences at each sampling time (every 3 months until  
485 24 months post-vaccination) is shown as a contour map truncated by the convex hull of the simulated points,  
486 with the median values marked by a cross. These crosses are connected chronologically, and those  
487 corresponding to 0, 12, and 24 months post-vaccination are labeled. The dashed line indicates equal  
488 prevalences in the two arms. **(D-F)** The kernel density estimate of the total sample size (combined size of both  
489 samples) needed to detect a difference between control and vaccine arm prevalences at each sampling time  
490 (assuming 80% power, 5% type I error rate, balanced arms). The horizontal bars in each violin plot indicate the

491 minimum, median, and maximum values across all simulations. In (D), the maximum sample sizes for infants  
492 and for toddlers at 3 months post-vaccination are greater than one hundred thousand and not shown.

493 **Fig S5. Population and trial arm size sensitivity analyses. (A)** The age-specific prevalence in the control and  
494 wSP 10 c.e. (conferring an additional 92% reduction in carriage duration) infant arms for three different  
495 population sizes – 10K, 25K, and 50K individuals – with the trial arm size fixed at 5K participants. **(B)** The age-  
496 specific prevalence in the control and wSP 10 c.e. infant arms for three different trial arm sizes – 2.5K, 5K, and  
497 10K participants – with the population size fixed at 25K. Each violin plot shows the distribution of prevalences  
498 across 25 simulations, with horizontal bars marking the minimum, median, and maximum values, and darker  
499 shades indicating larger population or trial arm sizes. The values used in the main analyses – a population size  
500 of 10K and a trial arm size of 5K – are marked with asterisks in the legends.

## 501 References

- 502 1. Bogaert D, De Groot R, Hermans PWM. Streptococcus pneumoniae colonisation: the key  
503 to pneumococcal disease. *Lancet Infect Dis*. Elsevier; 2004 Mar;4(3):144–54.
- 504 2. Jacups SP. The continuing role of Haemophilus influenzae type b carriage surveillance as  
505 a mechanism for early detection of invasive disease activity. *Hum Vaccin*. Taylor &  
506 Francis; 2011 Dec;7(12):1254–60.
- 507 3. Read RC. Neisseria meningitidis; clones, carriage, and disease. *Clinical Microbiology and*  
508 *Infection*. 2014 May 1;20(5):391–5.
- 509 4. Dagan R, Givon-Lavi N, Zamir O, Sikuler-Cohen M, Guy L, Janco J, et al. Reduction of  
510 nasopharyngeal carriage of Streptococcus pneumoniae after administration of a 9-valent  
511 pneumococcal conjugate vaccine to toddlers attending day care centers. *J Infect Dis*.  
512 2002 Apr 1;185(7):927–36.
- 513 5. Nohynek H, Mäkelä PH, Lucero MG. The impact of 11-valent pneumococcal conjugate  
514 vaccine on nasopharyngeal carriage of Streptococcus pneumoniae in Philippine children.  
515 6th International Symposium on Pneumococci ...; 2008.
- 516 6. Kilpi TM, Syrjänen R, Palmu A, Herva E, Eskola J. Parallel evaluation of the effect of a 7-  
517 valent pneumococcal conjugate vaccine (PNCCRM) on pneumococcal (PNC) carriage  
518 and acute otitis media (AOM). 19th Annual Meeting of the ...; 2001.
- 519 7. Prymula R, Kriz P, Kaliskova E, Pascal T, Poolman J, Schuerman L. Effect of vaccination  
520 with pneumococcal capsular polysaccharides conjugated to Haemophilus influenzae-  
521 derived protein D on nasopharyngeal carriage of Streptococcus pneumoniae and H.  
522 influenzae in children under 2 years of age. *Vaccine*. 2009 Dec 10;28(1):71–8.
- 523 8. O'Brien KL, Millar EV, Zell ER, Bronsdon M, Weatherholtz R, Reid R, et al. Effect of  
524 pneumococcal conjugate vaccine on nasopharyngeal colonization among immunized and  
525 unimmunized children in a community-randomized trial. *J Infect Dis*. 2007 Oct  
526 15;196(8):1211–20.



- 527 9. Cheung Y-B, Zaman SMA, Nsekpong ED, Van Beneden CA, Adegbola RA, Greenwood  
528 B, et al. Nasopharyngeal carriage of *Streptococcus pneumoniae* in Gambian children who  
529 participated in a 9-valent pneumococcal conjugate vaccine trial and in their younger  
530 siblings. *Pediatr Infect Dis J*. 2009 Nov;28(11):990–5.
- 531 10. Mbelle N, Huebner RE, Wasas AD, Kimura A, Chang I, Klugman KP. Immunogenicity and  
532 impact on nasopharyngeal carriage of a nonavalent pneumococcal conjugate vaccine. *J*  
533 *Infect Dis*. 1999 Oct;180(4):1171–6.
- 534 11. Goldblatt D, Ramakrishnan M, O'Brien K. Using the impact of pneumococcal vaccines on  
535 nasopharyngeal carriage to aid licensing and vaccine implementation; a PneumoCarr  
536 meeting report March 27-28, 2012, Geneva. 2013. pp. 146–52.
- 537 12. Read RC, Baxter D, Chadwick DR, Faust SN, Finn A, Gordon SB, et al. Effect of a  
538 quadrivalent meningococcal ACWY glycoconjugate or a serogroup B meningococcal  
539 vaccine on meningococcal carriage: an observer-blind, phase 3 randomised clinical trial.  
540 *The Lancet*. Elsevier; 2014 Dec 13;384(9960):2123–31.
- 541 13. Rinta-Kokko H, Dagan R, Givon-Lavi N, Auranen K. Estimation of vaccine efficacy against  
542 acquisition of pneumococcal carriage. *Vaccine*. 2009 Jun 12;27(29):3831–7.
- 543 14. Mehtälä J, Dagan R, Auranen K. Estimation and interpretation of heterogeneous vaccine  
544 efficacy against recurrent infections. *Biometrics*. 2016 Sep 1;72(3):976–85.
- 545 15. Scott P, Herzog SA, Auranen K, Dagan R, Low N, Egger M, et al. Timing of bacterial  
546 carriage sampling in vaccine trials: a modelling study. *Epidemics* [Internet]. 2014 Dec;9:8–  
547 17. Available from:  
548 [http://eutils.ncbi.nlm.nih.gov/entrez/eutils/elink.fcgi?dbfrom=pubmed&id=25480130&retmo](http://eutils.ncbi.nlm.nih.gov/entrez/eutils/elink.fcgi?dbfrom=pubmed&id=25480130&retmode=ref&cmd=prlinks)  
549 [de=ref&cmd=prlinks](http://eutils.ncbi.nlm.nih.gov/entrez/eutils/elink.fcgi?dbfrom=pubmed&id=25480130&retmode=ref&cmd=prlinks)
- 550 16. Weinberger DM, Dagan R, Givon-Lavi N, Regev-Yochay G, Malley R, Lipsitch M.  
551 Epidemiologic evidence for serotype-specific acquired immunity to pneumococcal  
552 carriage. *J Infect Dis*. Oxford University Press; 2008 Jun 1;197(11):1511–8.
- 553 17. Lu Y-J, Gross J, Bogaert D, Finn A, Bagrade L, Zhang Q, et al. Interleukin-17A mediates  
554 acquired immunity to pneumococcal colonization. Philpott DJ, editor. *PLoS Pathog*. Public  
555 Library of Science; 2008 Sep 19;4(9):e1000159.
- 556 18. Granat SM, Ollgren J, Herva E, Mia Z, Auranen K, Mäkelä PH. Epidemiological evidence  
557 for serotype-independent acquired immunity to pneumococcal carriage. *J Infect Dis*.  
558 Oxford University Press; 2009 Jul 1;200(1):99–106.
- 559 19. Gray BM, Converse GM, Dillon HC. Epidemiologic studies of *Streptococcus pneumoniae*  
560 in infants: acquisition, carriage, and infection during the first 24 months of life. *J Infect Dis*.  
561 1980 Dec;142(6):923–33.
- 562 20. Lipsitch M, Abdullahi O, D'Amour A, Xie W, Weinberger DM, Tchetgen Tchetgen E, et al.  
563 Estimating rates of carriage acquisition and clearance and competitive ability for  
564 pneumococcal serotypes in Kenya with a Markov transition model. *Epidemiology*. 2012  
565 Jul;23(4):510–9.

- 566 21. Wyllie AL, Chu MLJN, Schellens MHB, van Engelsdorp Gastelaars J, Jansen MD, van der  
567 Ende A, et al. Streptococcus pneumoniae in saliva of Dutch primary school children. de  
568 Lencastre H, editor. PLoS ONE. Public Library of Science; 2014;9(7):e102045.
- 569 22. Rodrigues F, Danon L, Morales-Aza B, Sikora P, Thors V, Ferreira M, et al.  
570 Pneumococcal Serotypes Colonise the Nasopharynx in Children at Different Densities.  
571 Melo-Cristino J, editor. PLoS ONE. Public Library of Science; 2016;11(9):e0163435.
- 572 23. GUNDEL M, OKURA G. Observations on the Simultaneous Presence of Several Types of  
573 Pneumocoeci in Healthy Persons, and their Significance in Epidemiology. Zeitschrift fur  
574 Hygiene und .... 1933.
- 575 24. Maire N, APONTE JJ, ROSS A, THOMPSON R, ALONSO P, UTZINGER J, et al.  
576 Modeling a field trial of the RTS,S/AS02A malaria vaccine. Am J Trop Med Hyg. American  
577 Society of Tropical Medicine and Hygiene; 2006 Aug;75(2 Suppl):104–10.
- 578 25. Boren D, Sullivan PS, Beyrer C, Baral SD, Bekker LG, Brookmeyer R. Stochastic variation  
579 in network epidemic models: implications for the design of community level HIV  
580 prevention trials. Statistics in Medicine [Internet]. 2014 Sep 30;33(22):3894–904.  
581 Available from: <http://onlinelibrary.wiley.com/doi/10.1002/sim.6193/full>
- 582 26. Halloran ME, Auranen K, Baird S, Basta NE, Bellan SE, Brookmeyer R, et al. Simulations  
583 for designing and interpreting intervention trials in infectious diseases. BMC Med. BioMed  
584 Central; 2017 Dec 29;15(1):223.
- 585 27. Gonçalves VM, Dias WO, Campos IB, Liberman C, Sbrogio-Almeida ME, Silva EP, et al.  
586 Development of a whole cell pneumococcal vaccine: BPL inactivation, cGMP production,  
587 and stability. Vaccine. 2014 Feb 19;32(9):1113–20.
- 588 28. PATH. Dose-Finding Study of S.Pneumoniae Whole Cell Vaccine Adsorbed to Alum  
589 (PATH-wSP) in Healthy Kenyan Adults and Toddlers  
590 . Available from: <https://clinicaltrials.gov/show/NCT02097472>
- 591 29. Lu Y-J, Leite L, Gonçalves VM, Dias W de O, Liberman C, Fratelli F, et al. GMP-grade  
592 pneumococcal whole-cell vaccine injected subcutaneously protects mice from  
593 nasopharyngeal colonization and fatal aspiration-sepsis. Vaccine. 2010 Nov  
594 3;28(47):7468–75.
- 595 30. Cobey S, Lipsitch M. Niche and neutral effects of acquired immunity permit coexistence of  
596 pneumococcal serotypes. Science. American Association for the Advancement of  
597 Science; 2012 Mar 16;335(6074):1376–80.
- 598 31. Abdullahi O, Karani A, Tigoi CC, Mugo D, Kungu S, Wanjiru E, et al. The prevalence and  
599 risk factors for pneumococcal colonization of the nasopharynx among children in Kilifi  
600 District, Kenya. Ratner AJ, editor. PLoS ONE. Public Library of Science;  
601 2012;7(2):e30787.
- 602 32. Auranen K, Rinta-Kokko H, Goldblatt D, Nohynek H, O'Brien KL, Satzke C, et al. Design  
603 questions for Streptococcus pneumoniae vaccine trials with a colonisation endpoint.

- 604 Vaccine. 2013 Dec;32(1):159–64.
- 605 33. Odutola A, Ota MOC, Antonio M, Ogundare EO, Saidu Y, Foster-Nyarko E, et al. Efficacy  
606 of a novel, protein-based pneumococcal vaccine against nasopharyngeal carriage of  
607 *Streptococcus pneumoniae* in infants: A phase 2, randomized, controlled, observer-blind  
608 study. Vaccine. 2017 May 2;35(19):2531–42.
- 609 34. Wang H, Chow SC. Sample size calculation for comparing proportions. Wiley  
610 Encyclopedia of Clinical Trials.
- 611 35. Kluyver T, Ragan-Kelley B, Pérez F, Granger B, Bussonnier M, Frederic J, et al. Jupyter  
612 Notebooks – a publishing format for reproducible computational workflows. Proceedings  
613 of the th International Conference on Electronic Publishing. 2016.
- 614 36. Jones E, Oliphant T, Peterson P, and others. SciPy: Open Source Scientific Tools for  
615 Python [Internet]. 2001. Available from: <http://www.scipy.org>
- 616 37. Hunter JD. Matplotlib: A 2D graphics environment. Computing In Science & Engineering.  
617 2007.
- 618 38. United Nations, Department of Economic and Social Affairs, Population Division (2015).  
619 World Population Prospects: The 2015 Revision, Volume I: Comprehensive Tables.
- 620 39. Kiti MC, Kinyanjui TM, Koech DC, Munywoki PK, Medley GF, Nokes DJ. Quantifying age-  
621 related rates of social contact using diaries in a rural coastal population of Kenya.  
622 Borrmann S, editor. PLoS ONE. Public Library of Science; 2014;9(8):e104786.
- 623 40. Abdullahi O, Karani A, Tigoi CC, Mugo D, Kungu S, Wanjiru E, et al. Rates of acquisition  
624 and clearance of pneumococcal serotypes in the nasopharynges of children in Kilifi  
625 District, Kenya. J Infect Dis. Oxford University Press; 2012 Oct 1;206(7):1020–9.
- 626 41. Malley R, Lipsitch M, Stack A, Saladino R, Fleisher G, Pelton S, et al. Intranasal  
627 immunization with killed unencapsulated whole cells prevents colonization and invasive  
628 disease by capsulated pneumococci. Infect Immun. American Society for Microbiology;  
629 2001 Aug;69(8):4870–3.
- 630 42. Murad C, Dunne EM, Sudigdoadi S, Pell C, Rusmil K, Fadlyana E, et al. Analysis of  
631 *Streptococcus pneumoniae* nasopharyngeal carriage in healthy infants in Indonesia  
632 during the first year of life. Abstract 347. 10th International Symposium on Pneumococci  
633 and Pneumococcal Diseases. Glasgow, UK; 2016.
- 634

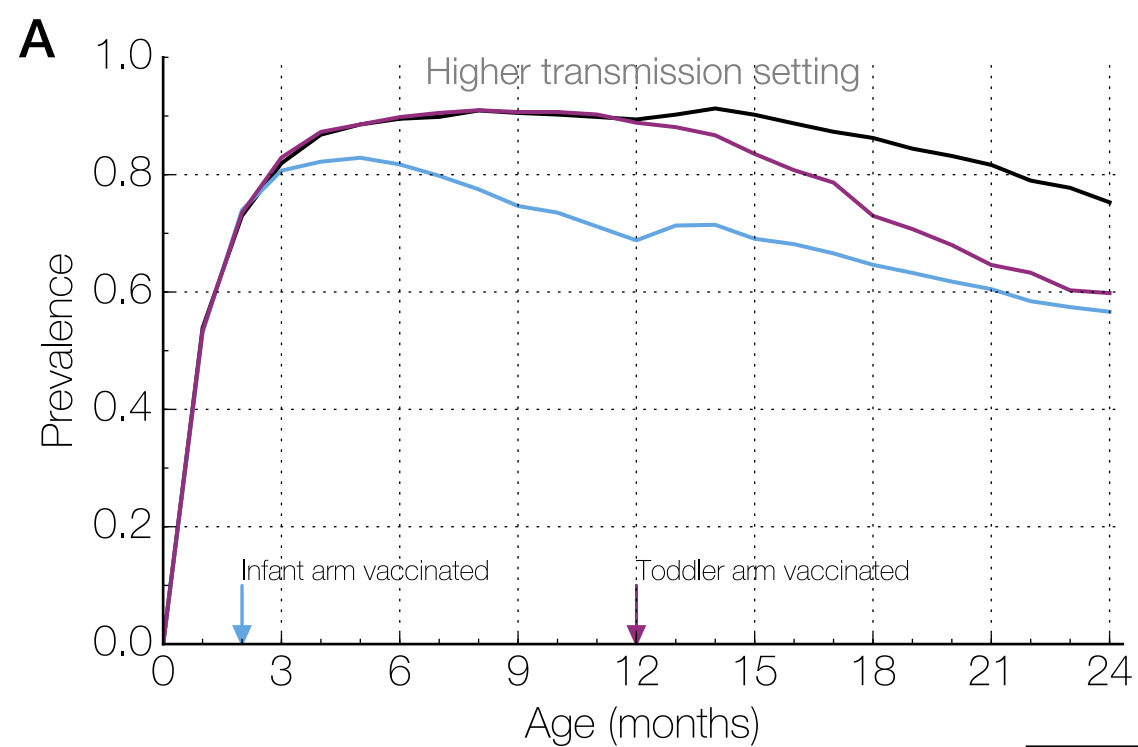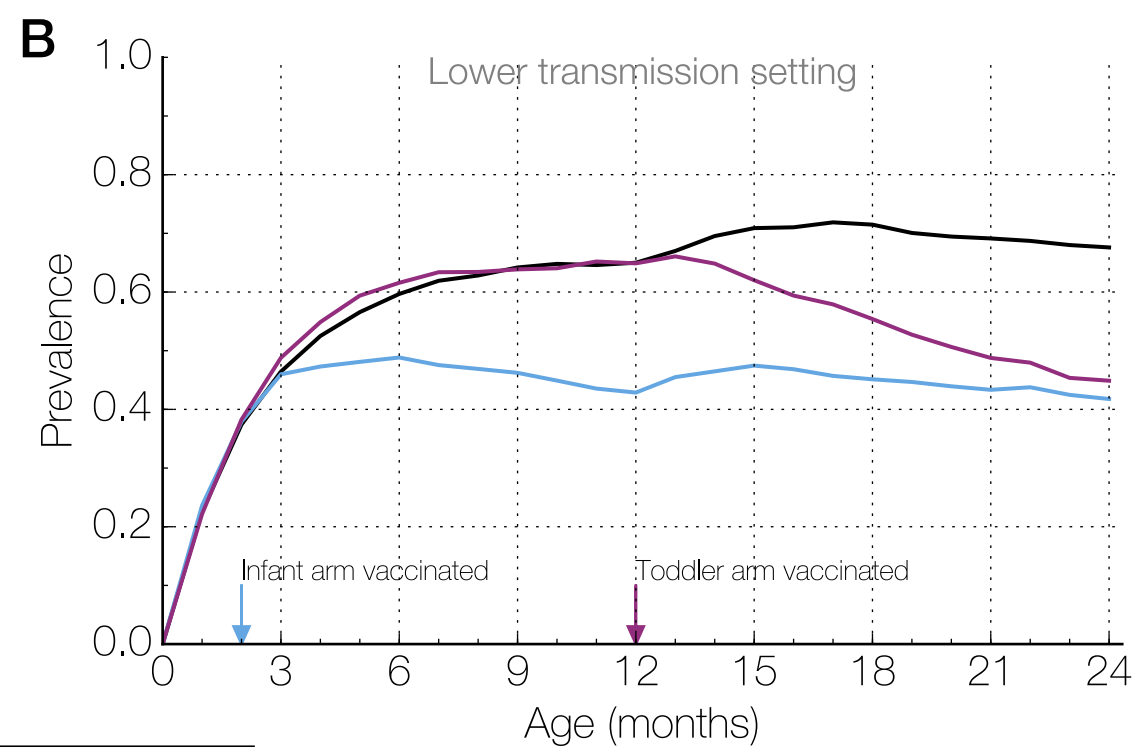

**Fig 1**

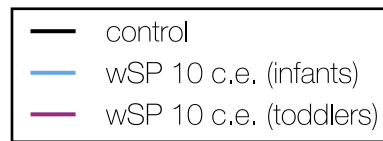

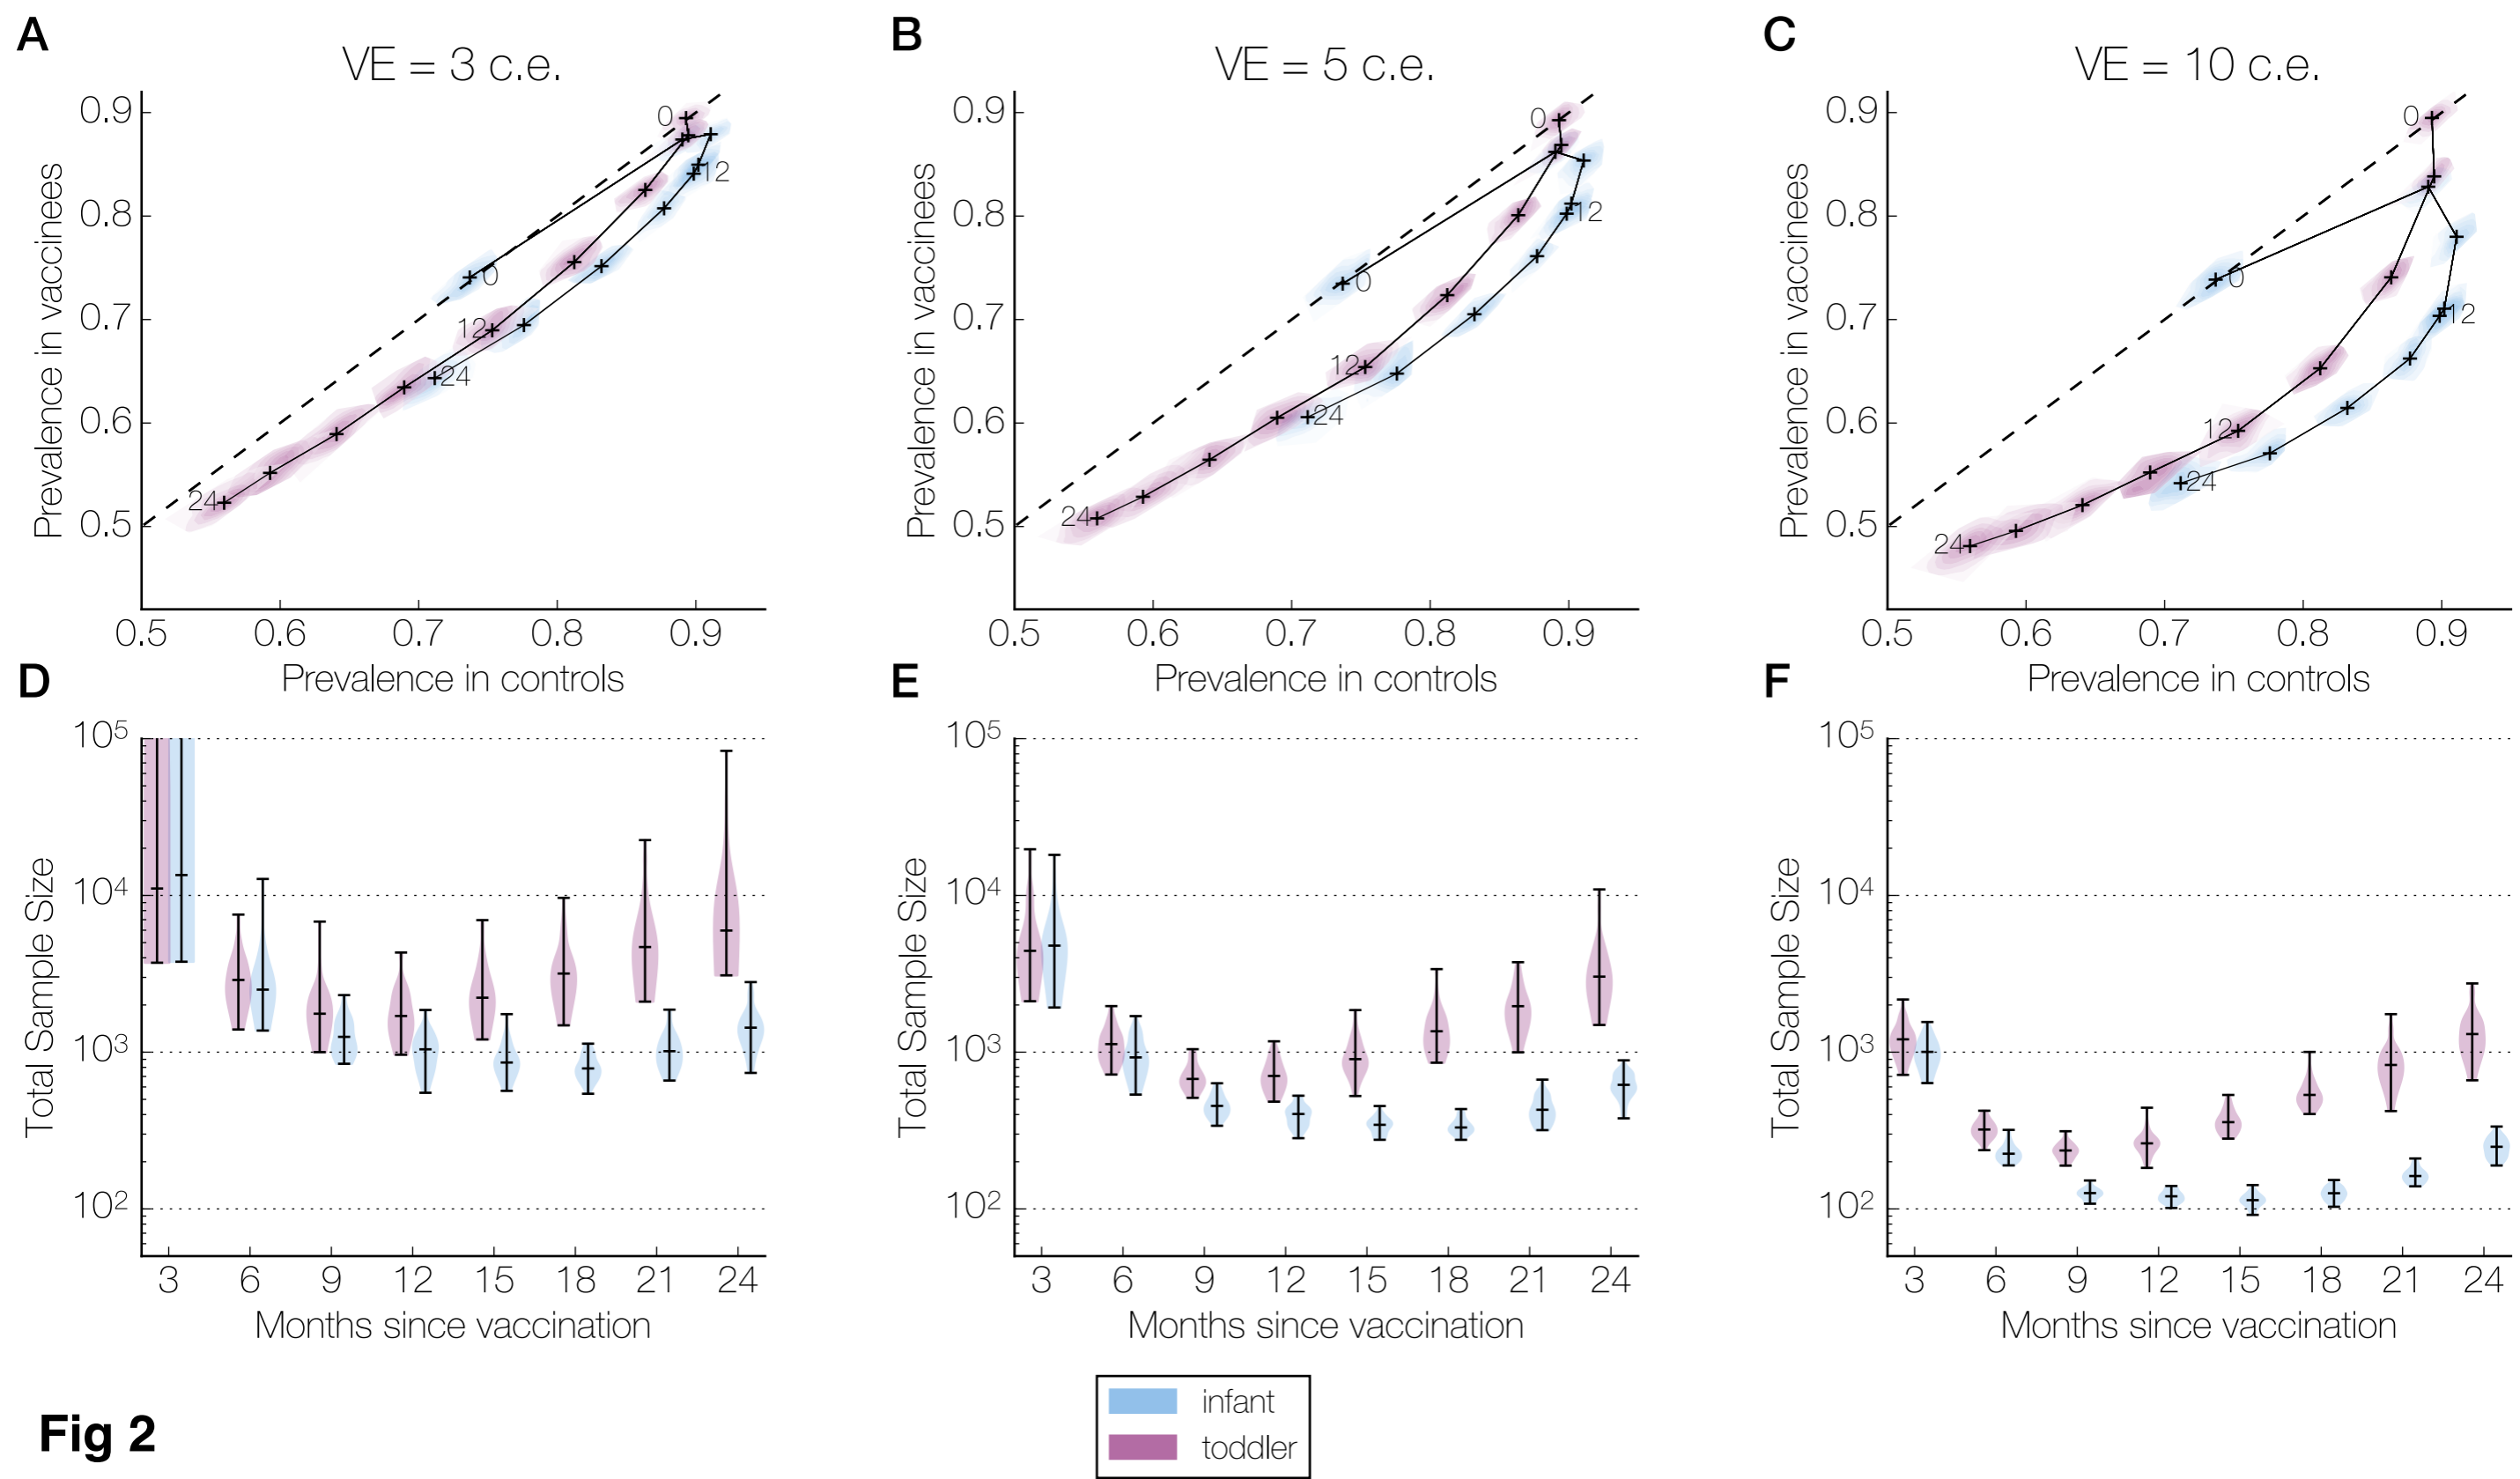

**Fig 2**

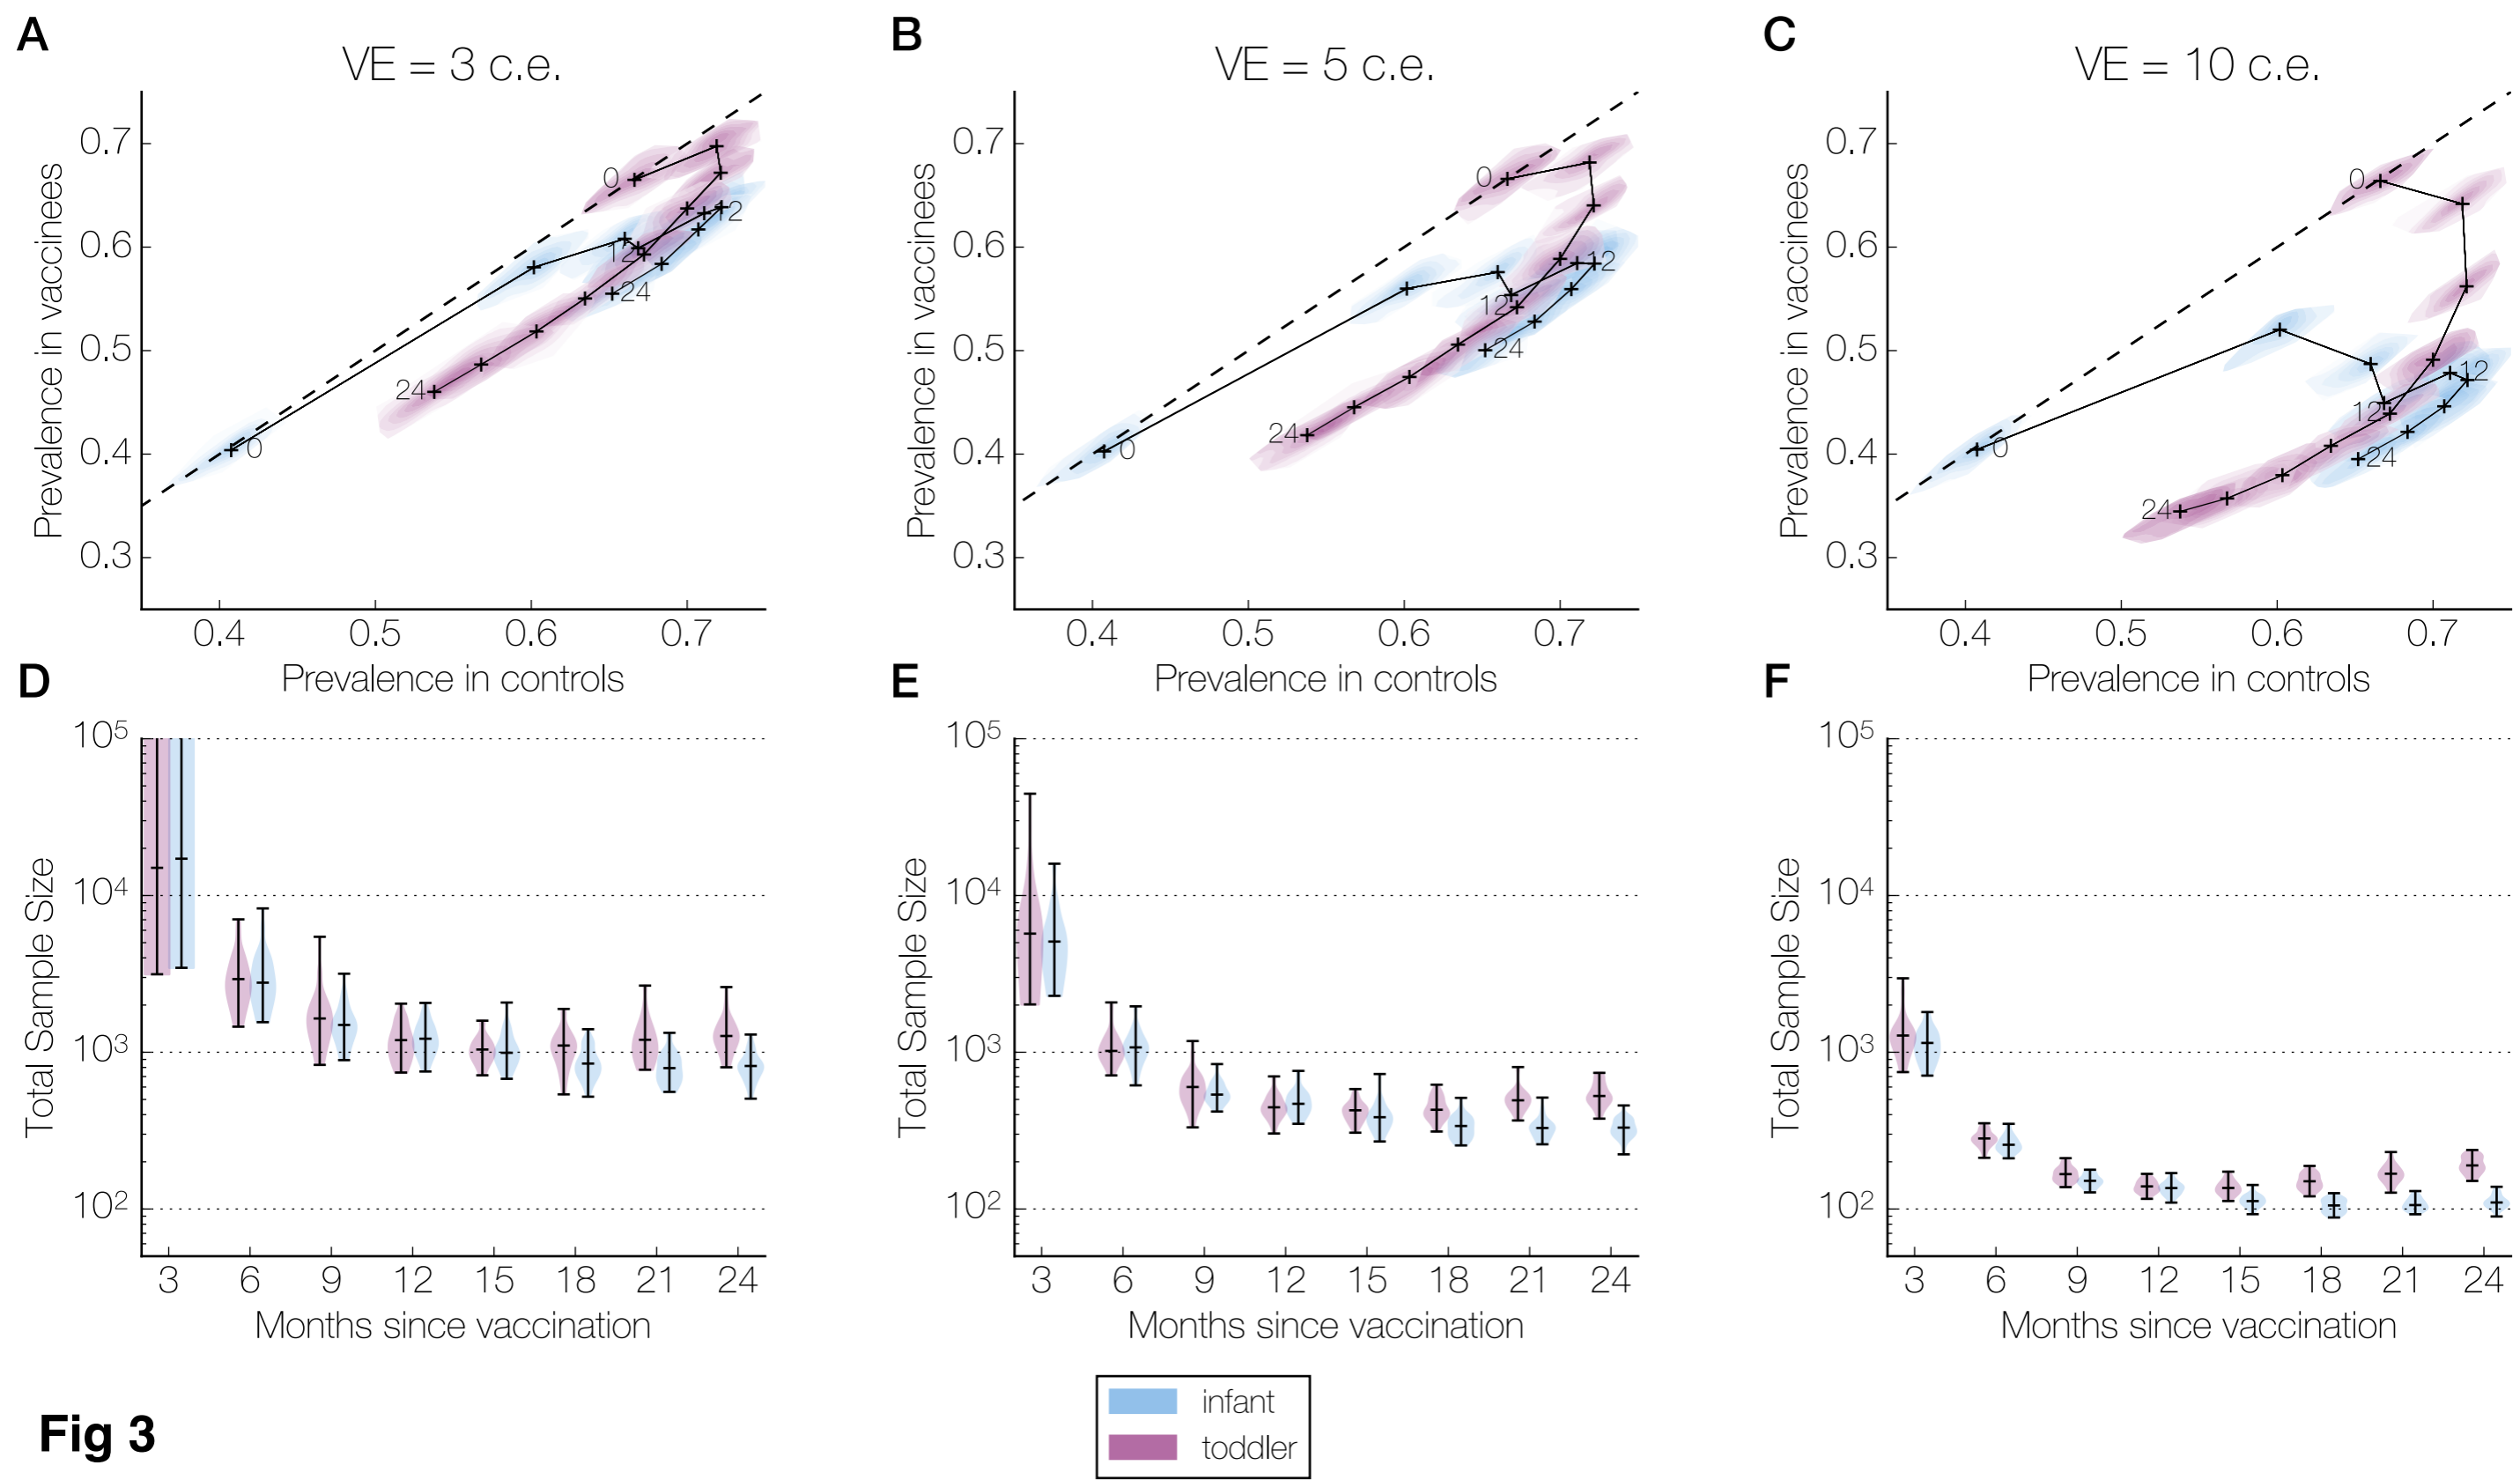

**Fig 3**

# Use of an individual-based model of pneumococcal carriage for planning a randomized trial of a vaccine

Francisco Y. Cai<sup>1,2\*</sup>, Thomas Fussell<sup>1</sup>, Sarah E. Cobey<sup>3</sup>, Marc Lipsitch<sup>1,2</sup>

<sup>1</sup> Department of Epidemiology, Harvard T. H. Chan School of Public Health, Boston, MA 02115, USA

<sup>2</sup> Center for Communicable Disease Dynamics, Harvard T. H. Chan School of Public Health, Boston, MA 02115, USA

<sup>3</sup> Department of Ecology and Evolution, University of Chicago, Chicago, IL 60637

\* Corresponding author

Email: francisco@mail.harvard.edu

## S1 Text. Model age structure

The age distribution and age-specific contact rate of hosts is important to consider in pneumococcal transmission modeling, since carriage prevalence varies with age [1,2], as does frequency of contact with other age groups [3,4].

The age distribution of the simulated hosts was matched to the 2015 age distribution in Kenya, based on data from the United Nations World Population Prospects [5]. The number of simulated hosts was constant, and for a fixed-sized population, we can set its age distribution by choosing the correct lifespan distribution: For a simulated host, the probability of living exactly  $n$  years is calculated as the difference in the number of  $n$ -year old people and  $n + 1$ -year old people, divided by the total number of people. For this method to be valid, the age distribution must be monotonically decreasing, i.e. there cannot be more people in an older age class as compared to any younger age class. This is the case for Kenya's age distribution in 2015. The World Population Prospects data was given in 5-year age classes, which we linearly interpolated to obtain 1-year age classes. The oldest age class in the data was 100 years or greater; in our model, we assume that the maximum lifespan is 101 years.

We derived age-specific mixing weights from social contact data collected in Kilifi, Kenya from 2011 to 2012 by Kiti et al [3]. Specifically, normalized the age group-specific average number of contacts per day by the size of the contacting age group and the size of the contacted age group. Since we fit the overall contact rate, for simplicity, we scaled the mixing weights so the maximum is 1. The weights used can be found in **Table S2**.

## References

1. Abdullahi O, Karani A, Tigo CC, Mugo D, Kungu S, Wanjiru E, et al. The prevalence and risk factors for pneumococcal colonization of the nasopharynx among children in Kilifi District, Kenya. Ratner AJ, editor. PLoS ONE. Public Library of Science; 2012;7(2):e30787.
2. Gray BM, TURNER ME, Dillon HC. Epidemiologic studies of Streptococcus pneumoniae in infants. The effects of season and age on pneumococcal acquisition and carriage in the first 24 months of life. Am J Epidemiol. Oxford University Press; 1982 Oct;116(4):692–703.
3. Kiti MC, Kinyanjui TM, Koech DC, Munywoki PK, Medley GF, Nokes DJ. Quantifying age-related rates of social contact using diaries in a rural coastal population of Kenya. Borrmann S, editor. PLoS ONE. Public Library of Science; 2014;9(8):e104786.
4. Wallinga J, Teunis P, Kretzschmar M. Using data on social contacts to estimate age-specific transmission parameters for respiratory-spread infectious agents. Am J Epidemiol. Oxford University Press; 2006 Nov 15;164(10):936–44.
5. United Nations, Department of Economic and Social Affairs, Population Division (2015). World Population Prospects: The 2015 Revision, Volume I: Comprehensive Tables.



# Use of an individual-based model of pneumococcal carriage for planning a randomized trial of a vaccine

Francisco Y. Cai<sup>1,2\*</sup>, Thomas Fussell<sup>1</sup>, Sarah E. Cobey<sup>3</sup>, Marc Lipsitch<sup>1,2</sup>

<sup>1</sup> Department of Epidemiology, Harvard T. H. Chan School of Public Health, Boston, MA 02115, USA

<sup>2</sup> Center for Communicable Disease Dynamics, Harvard T. H. Chan School of Public Health, Boston, MA 02115, USA

<sup>3</sup> Department of Ecology and Evolution, University of Chicago, Chicago, IL 60637

\* Corresponding author

Email: francisco@mail.harvard.edu

## S2 Text. Model fitting algorithm

To simulate specific epidemiological settings, we implemented an algorithm that fit model parameters to given serotype-specific carriage prevalences, e.g. prevalences from survey data. In our model, the prevalence of each serotype is determined primarily by its fitness parameter and the overall contact rate shared by all serotypes. The fitness parameter can take values, possibly non-integral, from 1 to  $n_s$ , the number of serotypes. Lower values correspond to better fitness. Lowering the fitness parameter results in two phenotypic changes—longer colonization duration and enhanced competitive ability—that both increase prevalence. Hence, there is a monotonic relationship between a serotype's fitness parameter and its expected carriage prevalence, and this allows us to tune the fitness parameters in a straightforward manner.

The algorithm iteratively updates its estimate of the serotype fitness parameters. Let the current estimate at the start of iteration  $k$  be denoted by the vector  $\vec{f}^k$ , indexed by serotype. We run a simulation using  $\vec{f}^k$ . For serotype  $s$ , let  $\hat{p}_s^k$  be its average prevalence over the last 25 simulation years,  $p_s$  be its observed prevalence, and  $\delta_s^k = \hat{p}_s^k - p_s$  be

the serotype-specific prevalence error. Based on this error, we update our estimate of the serotype's fitness parameter according to:

$$f_s^{k+1} = \min \left( n_s, \max \left( 1, f_s^k (1 + w_s^k \delta_s^k) \right) \right), \quad (1)$$

where the prevalence error is weighted by a factor  $w_s^k$  (**Fig S2A**). This factor is also updated iteratively, by comparing the prevalence error between the current and previous iteration. If the magnitude of the prevalence error is not decreasing enough between iterations, we increase the influence of the prevalence error in our updating of the fitness parameter, i.e. if  $\text{sgn}(\delta_s^k) = \text{sgn}(\delta_s^{k-1})$  and  $|\delta_s^k| > K_T |\delta_s^{k-1}|$ , then

$$w_s^{k+1} = K_w w_s^k, \quad (2)$$

where  $K_t$  is a positive constant and  $K_w$  is a constant greater than 1. On the other hand, if the magnitude of the prevalence error decreased enough between iterations, or if it has changed signs and has become larger in magnitude, then we reduce the influence of the prevalence error in our update, i.e. if  $\text{sgn}(\delta_s^k) = \text{sgn}(\delta_s^{k-1})$  and  $|\delta_s^k| \leq K_T |\delta_s^{k-1}|$  or  $\text{sgn}(\delta_s^k) \neq \text{sgn}(\delta_s^{k-1})$  and  $|\delta_s^k| > |\delta_s^{k-1}|$ , then

$$w_s^{k+1} = K_c w_s^k, \quad (3)$$

where  $K_c$  is positive constant less than 1. By adjusting  $w_s^k$  between iterations, we facilitate convergence of the fitness parameters: Equation (2) allows the algorithm to make larger adjustments when it is progressing too slowly, and Equation (3) causes the algorithm to be more cautious it is progressing quickly, or when the simulated prevalences start to oscillate around the observed prevalence. The latter is an indication that we are close to the optimal value for the fitness parameter—since the simulations are stochastic, we would not expect a properly fitted model to reproduce the observed

prevalence exactly, but rather a distribution of simulated prevalences centered on the observed prevalence (**Fig S2B**).

This algorithm attempts to fit all serotype-specific prevalences simultaneously. It assumes that adjusting the fitness parameter of one serotype does not affect the prevalence of another serotype. Since there is competition between serotypes for hosts, that assumption is not strictly true. Nevertheless, we find that in practice, the fitting algorithm is able to converge reasonably quickly, within 125 iterations when using a population size of 20,000.

There are  $n_s$  observed serotype-specific prevalences we are fitting to, but  $n_s + 1$  parameters: the  $n_s$  serotype fitness parameters and the overall contact rate. So that the model is not underspecified, we fix the fitness parameter for the fittest serotype to be 1, which corresponds to an intrinsic colonization duration of 150 days and a relative reduction of 0.25 in the risk of colonization by other strains. With one of the fitness parameter fixed, we are free to fit the contact rate. Let  $\beta^k$  be the current estimate of the contact rate in iteration  $k$ . Let  $p^k = \sum_s p_s^k$  be simulated carriage prevalence during iteration  $k$ ,  $p = \sum_s p_s$  be the observed carriage prevalence, and  $\delta^k = p^k - p$  be the total prevalence error. The update equation for  $\beta$  is similar to that of the fitness parameters:

$$\beta^{k+1} = \max\left(0, \beta^k(1 - w_\beta^k \delta^k)\right), \quad (4)$$

where  $w_\beta$  is a positive constant. As before  $w_\beta^k$  is updated as well, in the same fashion as described above for  $w_s^k$ , but with updating rules based on the  $\delta^k$  rather than  $\delta_s^k$ .

Parameters related to the fitting algorithm are summarized in **Table S1**.

**Table S1. Parameters of the fitting algorithm.**

| <b>Symbol</b> | <b>Description</b>                                       | <b>Value</b>                 |
|---------------|----------------------------------------------------------|------------------------------|
| $\beta^0$     | Initial overall contact rate                             | 0.1                          |
| $f_s^0$       | Initial fitness parameter for serotype $s$               | $\min(n_s, r_s + 5)^\dagger$ |
| $w_\beta^0$   | Relative step size for updating $\beta^0$                | 1                            |
| $f_s^0$       | Relative step size for updating $f_s^0$                  | 5                            |
| $K_T$         | Relative error threshold for reducing relative step size | 0.8                          |
| $K_W$         | Relative step size expansion factor                      | 1.05                         |
| $K_C$         | Relative step size reduction factor                      | 0.95                         |
| -             | Years sampled from end of simulation                     | 25                           |
| -             | Simulation population size (in thousands)                | 20                           |

$^\dagger n_s$  is the number of serotypes (56) and  $r_s$  is the rank of serotype  $s$  by observed prevalence.

**Table S2. Age-specific mixing weights.**

| <b>Age<br/>(years)</b> | <b>&lt;1</b> | <b>1-5</b> | <b>6-14</b> | <b>15-20</b> | <b>21-50</b> | <b>&gt;50</b> |
|------------------------|--------------|------------|-------------|--------------|--------------|---------------|
| <b>&lt;1</b>           | 0.1391       | 0.3739     | 0.4017      | 0.2938       | 0.4015       | 0.2566        |
| <b>1-5</b>             | 0.3739       | 0.6283     | 0.5460      | 0.2844       | 0.3561       | 0.2517        |
| <b>6-14</b>            | 0.4017       | 0.5460     | 0.8344      | 0.4775       | 0.3067       | 0.2304        |
| <b>15-20</b>           | 0.2938       | 0.2844     | 0.4775      | 1.0000       | 0.4243       | 0.2877        |
| <b>21-50</b>           | 0.4015       | 0.3561     | 0.3067      | 0.4243       | 0.7304       | 0.5665        |
| <b>&gt;50</b>          | 0.2566       | 0.2517     | 0.2304      | 0.2877       | 0.5665       | 0.5582        |

**Table S3. Fitted serotype fitness parameters.**

| <b>Serotype</b> | <b>Parameter value</b> |
|-----------------|------------------------|
| 19F             | 1.00                   |
| 6A              | 1.75                   |
| 6B              | 3.18                   |
| 23F             | 6.20                   |
| 11A             | 7.92                   |
| 14              | 8.37                   |
| 35B             | 8.40                   |
| 23B             | 10.01                  |
| 10A             | 11.67                  |
| 15B             | 12.03                  |
| 9V              | 12.52                  |
| 19A             | 12.56                  |
| 15A             | 12.70                  |
| 13              | 12.81                  |
| 15C             | 14.39                  |
| 34              | 15.66                  |
| 16F             | 16.83                  |
| 3               | 16.83                  |
| 18C             | 18.50                  |
| 19B             | 20.01                  |
| 7C              | 21.42                  |
| 20              | 22.14                  |
| 21              | 24.31                  |
| 23A             | 24.51                  |
| 35A             | 27.62                  |
| 33B             | 29.27                  |
| 1               | 29.55                  |
| 4               | 31.08                  |
| 38              | 37.22                  |
| 35F             | 39.19                  |
| 10F             | 41.82                  |
| 24F             | 47.45                  |
| 12F             | 48.24                  |
| 33D             | 48.33                  |
| 22A             | 51.21                  |

|     |       |
|-----|-------|
| 18F | 51.56 |
| 29  | 52.07 |
| 22F | 52.54 |
| 28F | 53.03 |
| 17F | 53.20 |
| 10B | 53.89 |
| 28A | 55.99 |
| 8   | 55.99 |
| 9L  | 56.00 |
| 15F | 56.00 |
| 40  | 56.00 |
| 12B | 56.00 |
| 11D | 56.00 |
| 18B | 56.00 |
| 19C | 56.00 |
| 31  | 56.00 |
| 33C | 56.00 |
| 5   | 56.00 |
| 7F  | 56.00 |
| 9A  | 56.00 |
| 9N  | 56.00 |

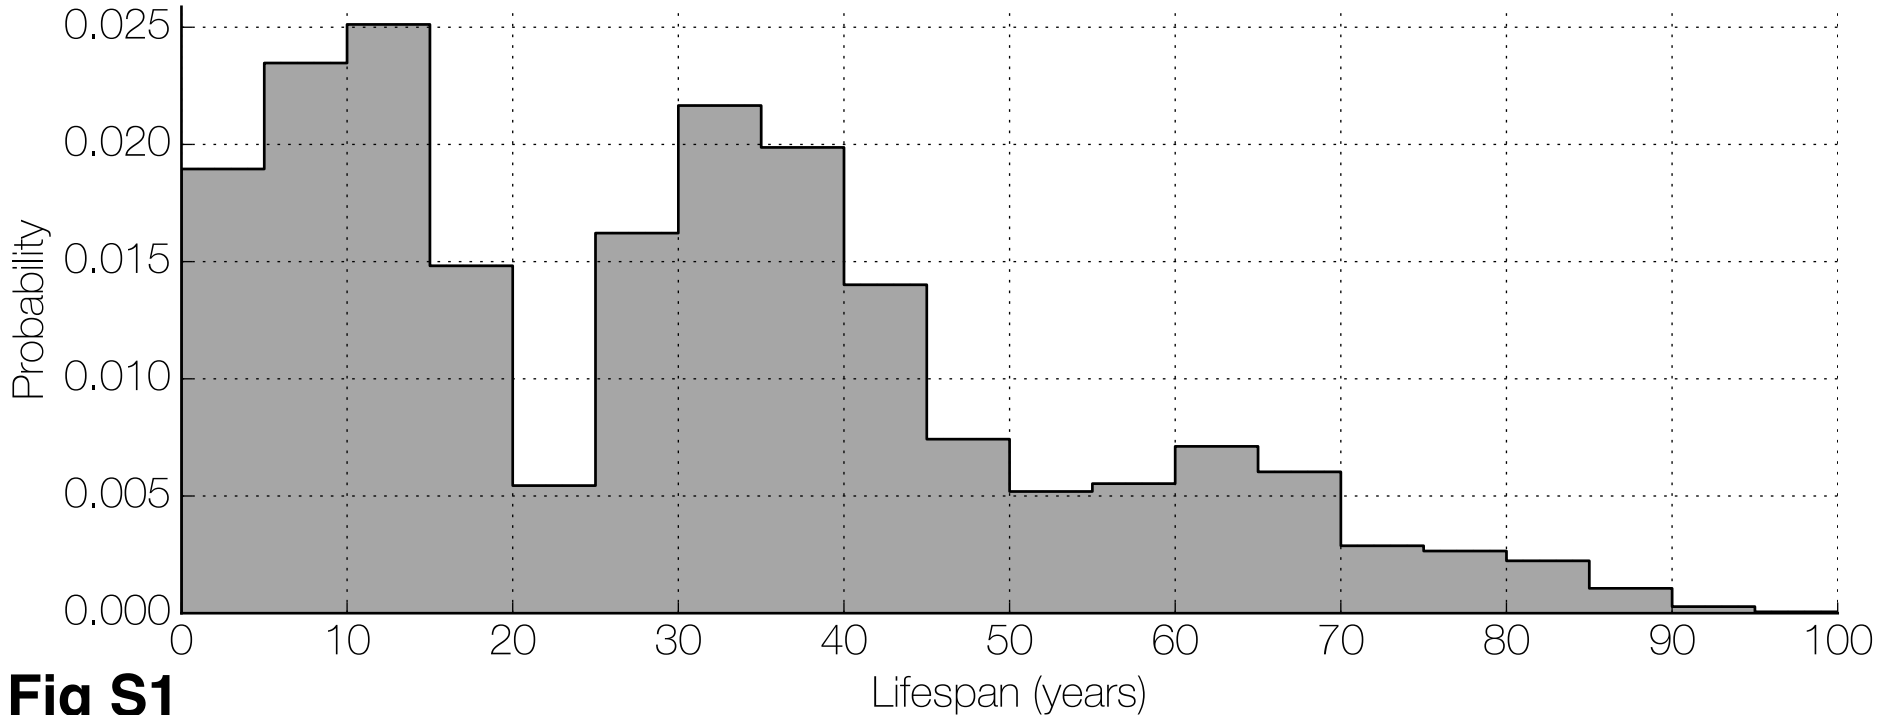

**Fig S1**



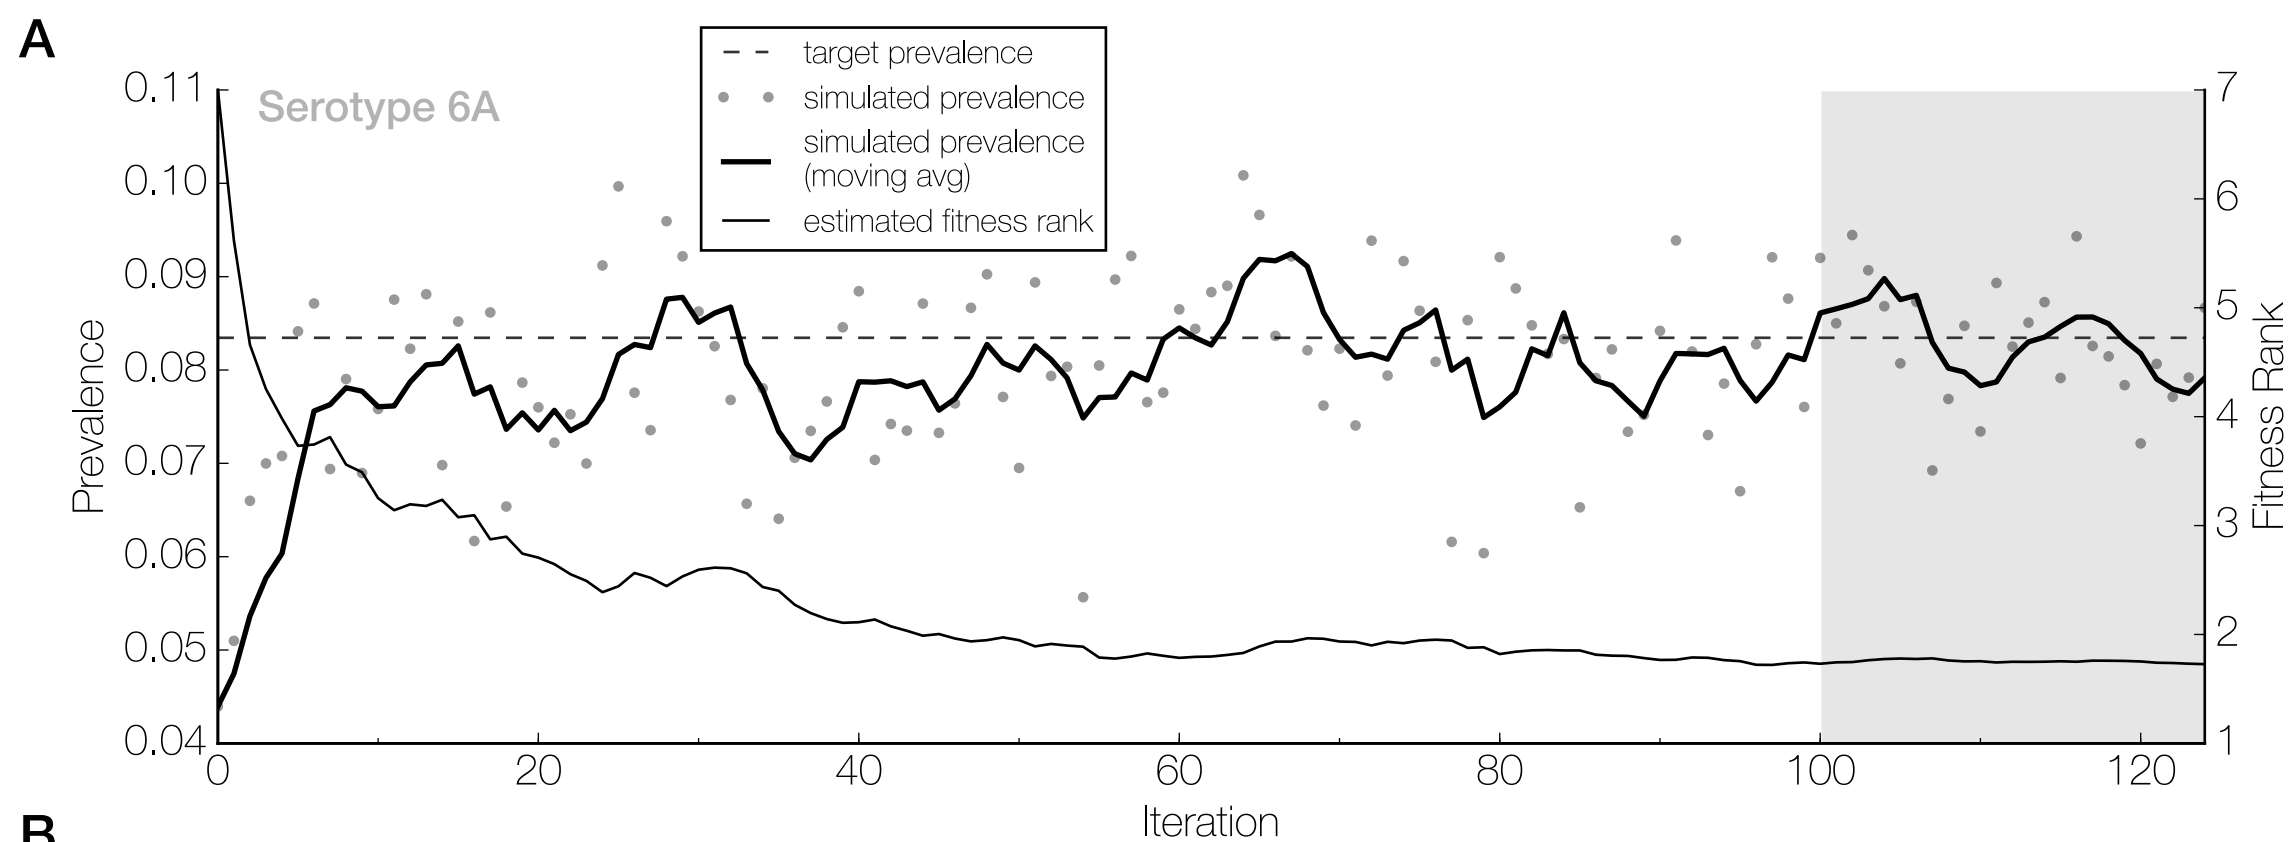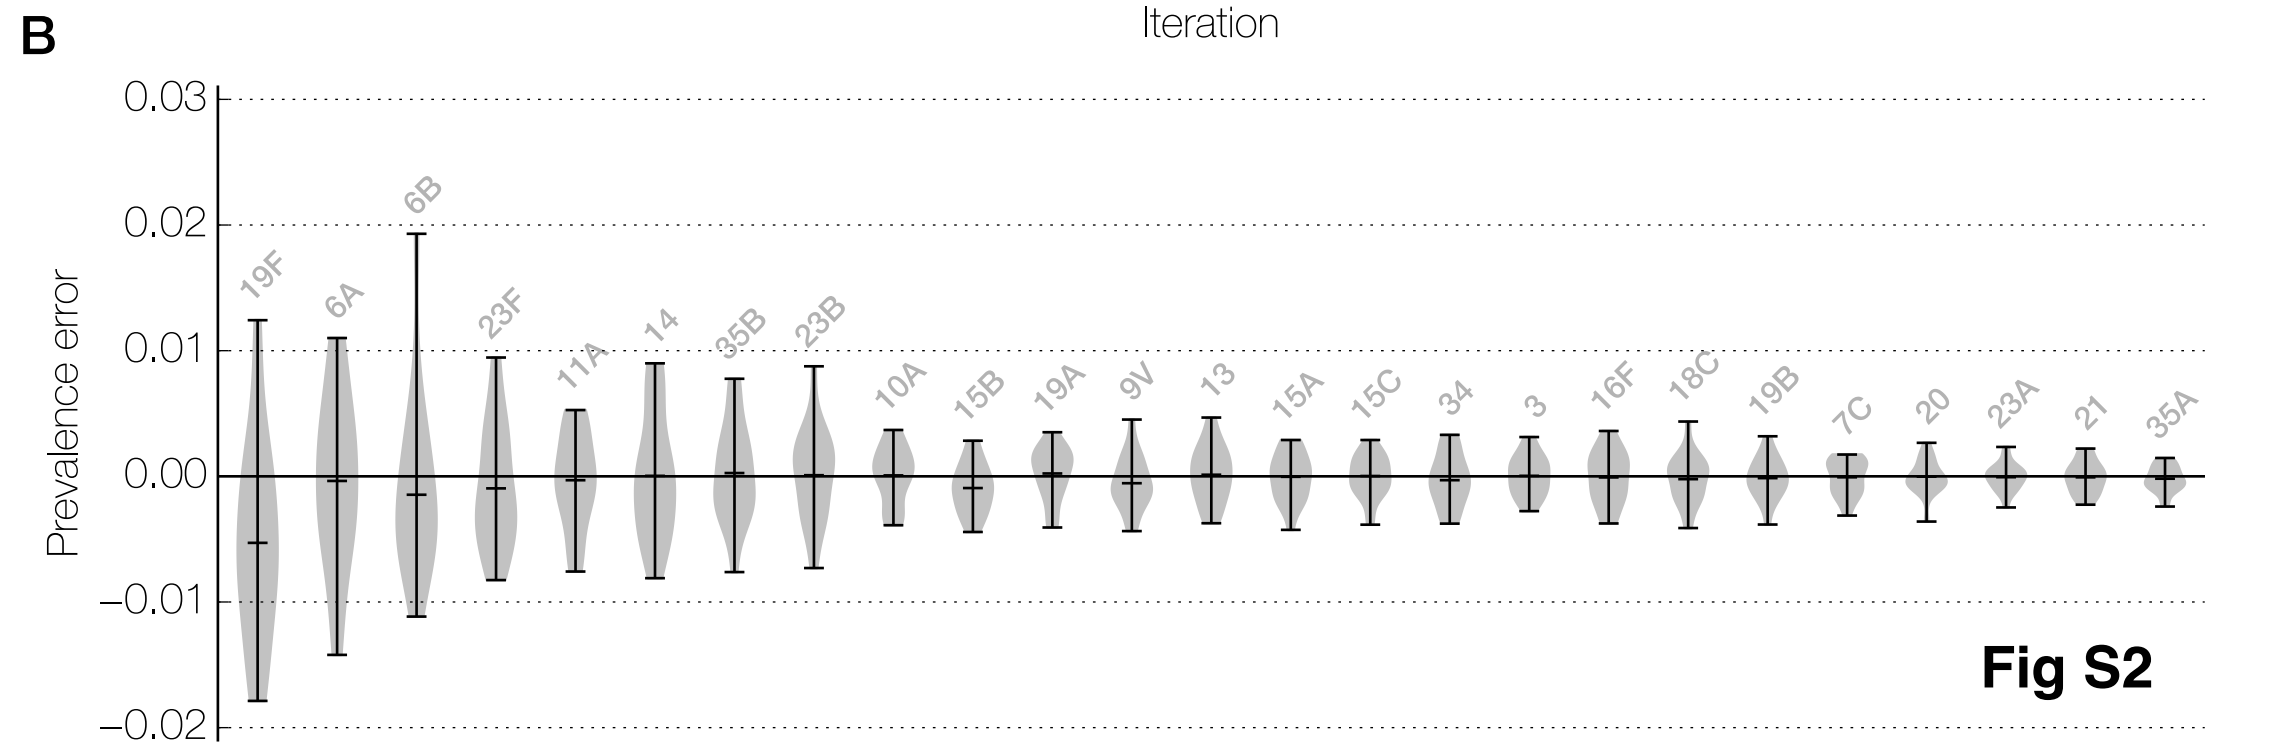

**Fig S2**

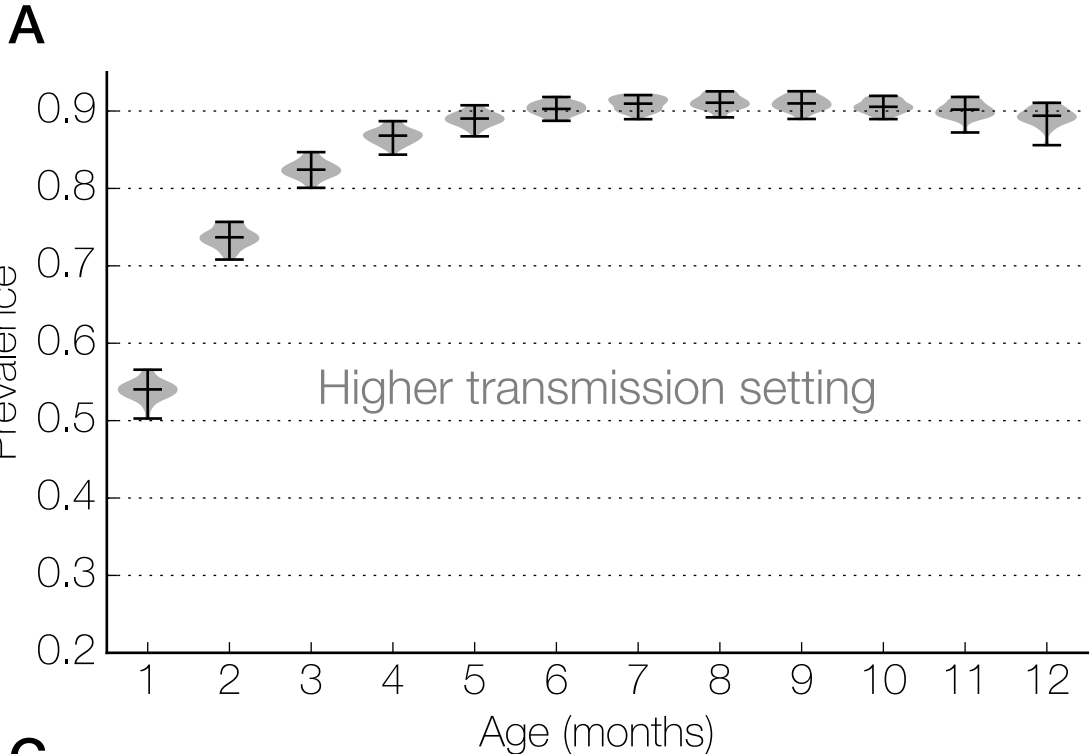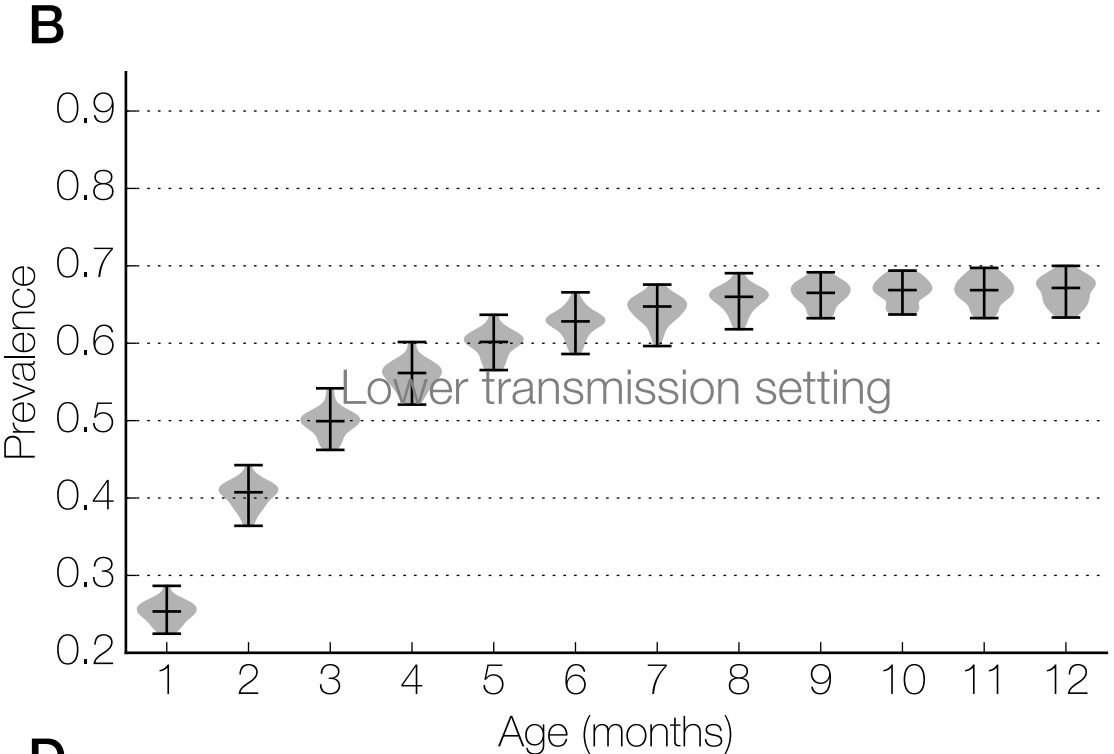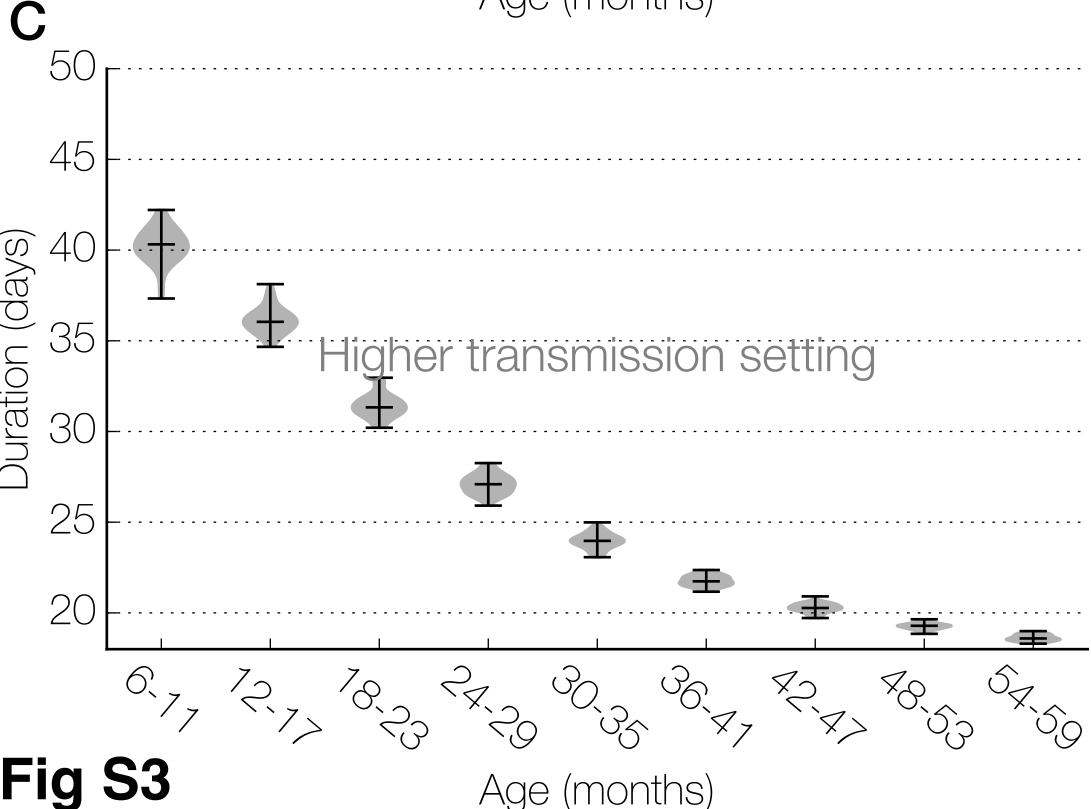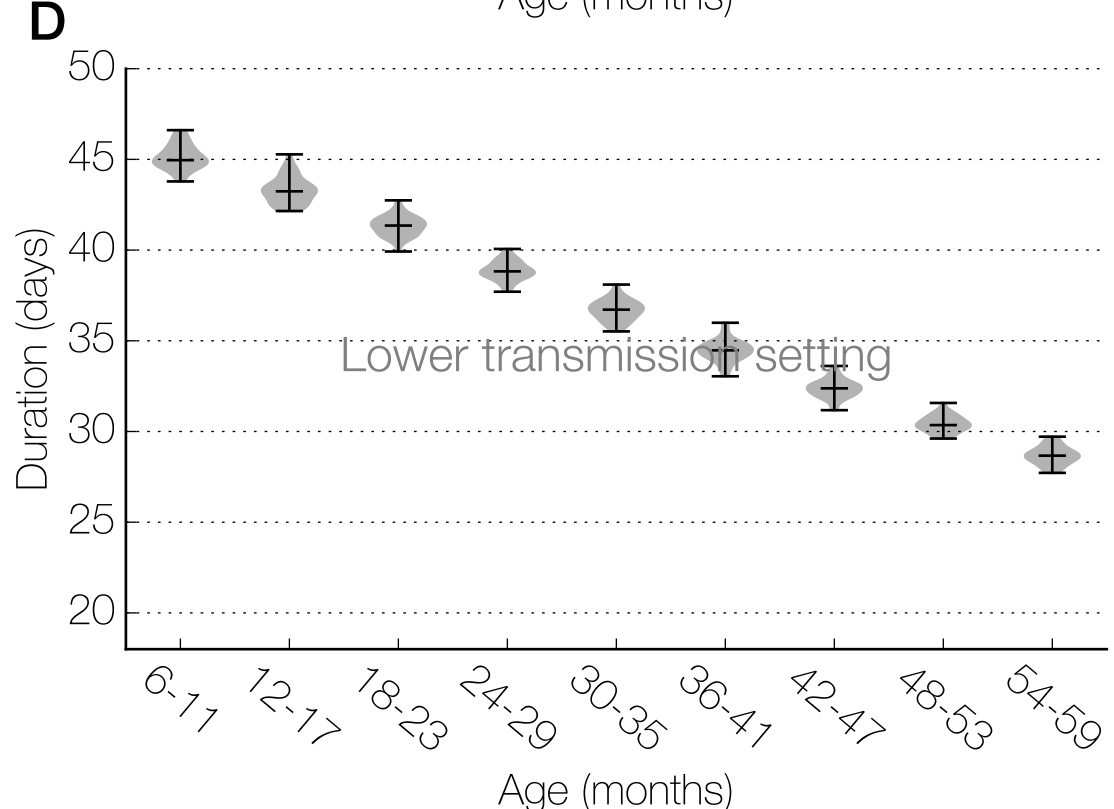

**Fig S3**

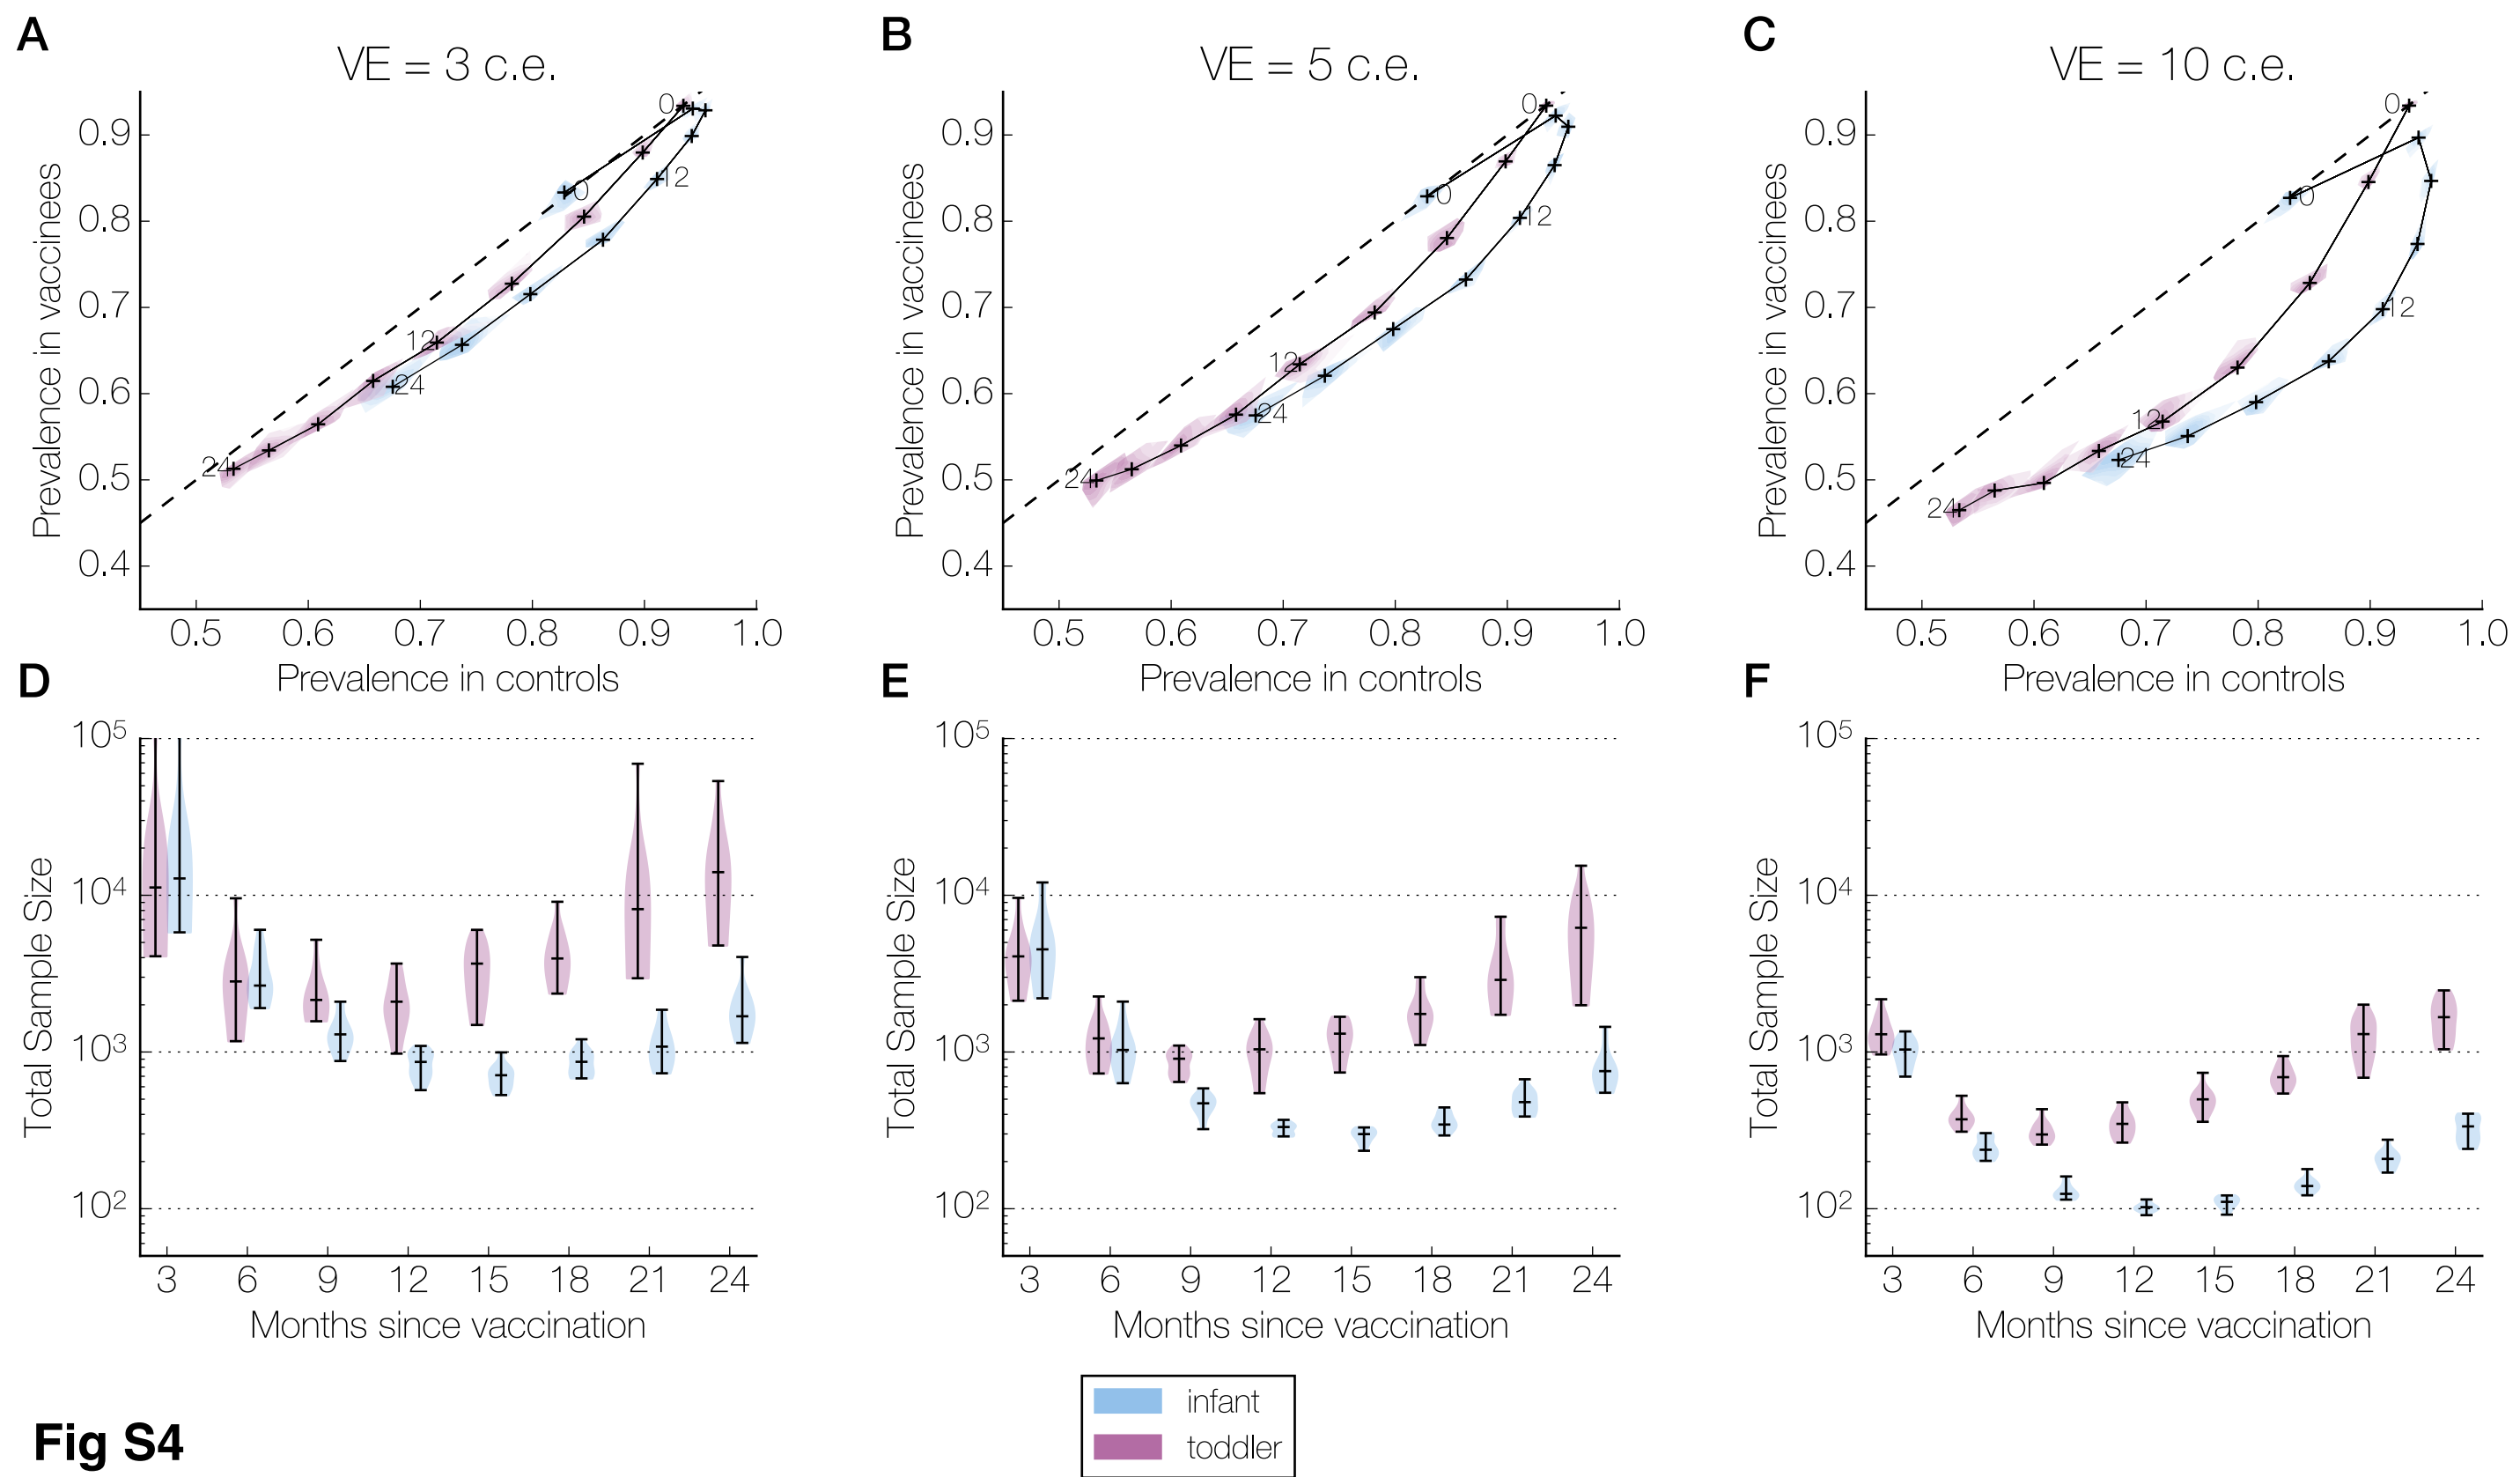

**Fig S4**

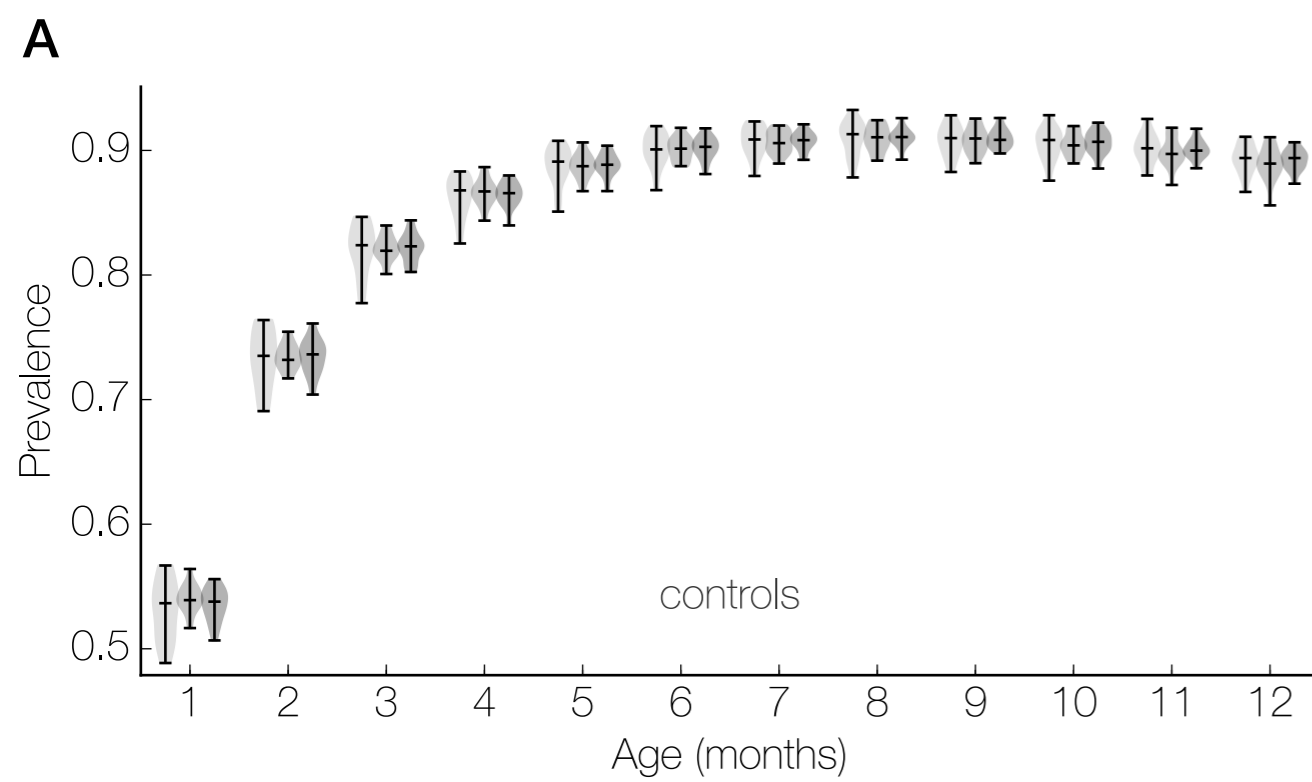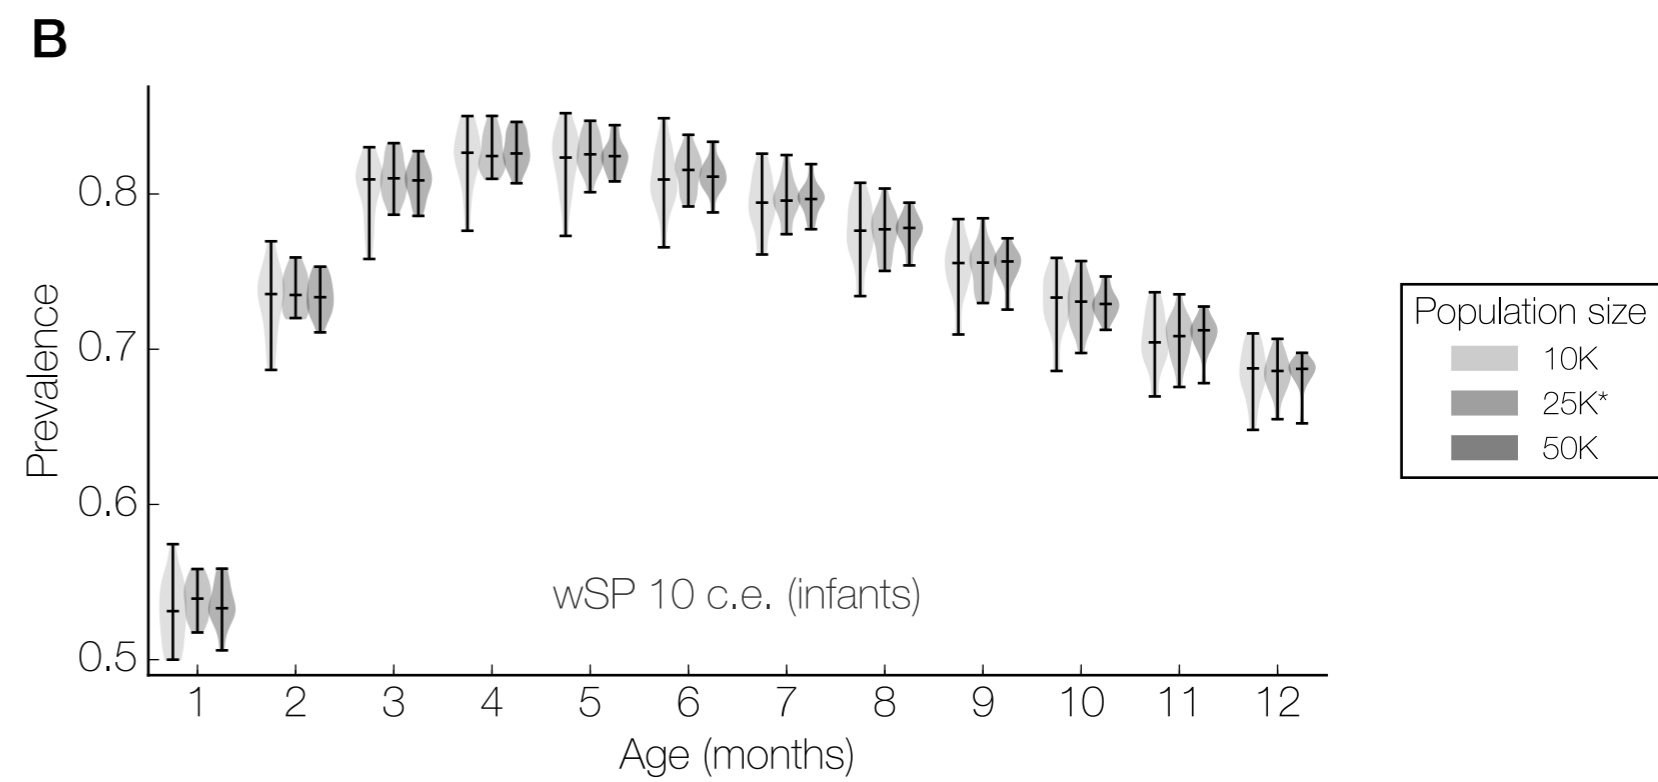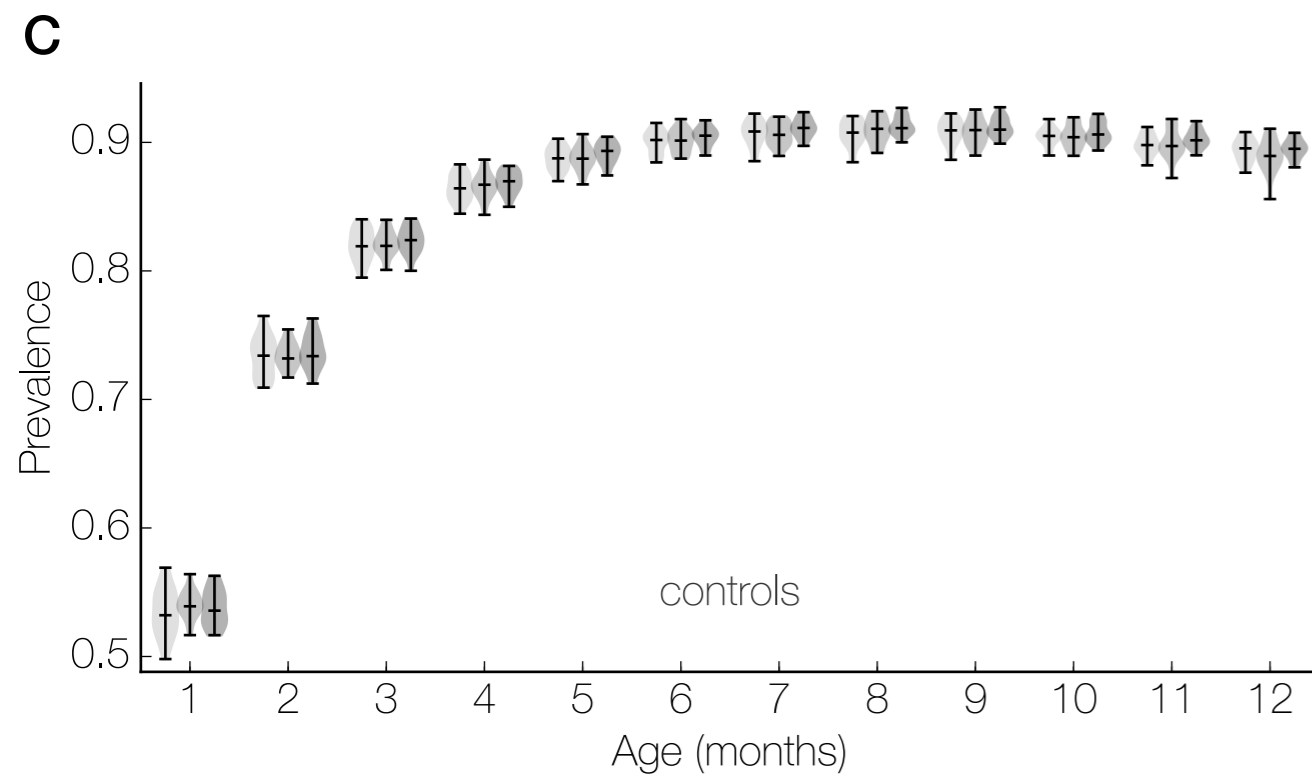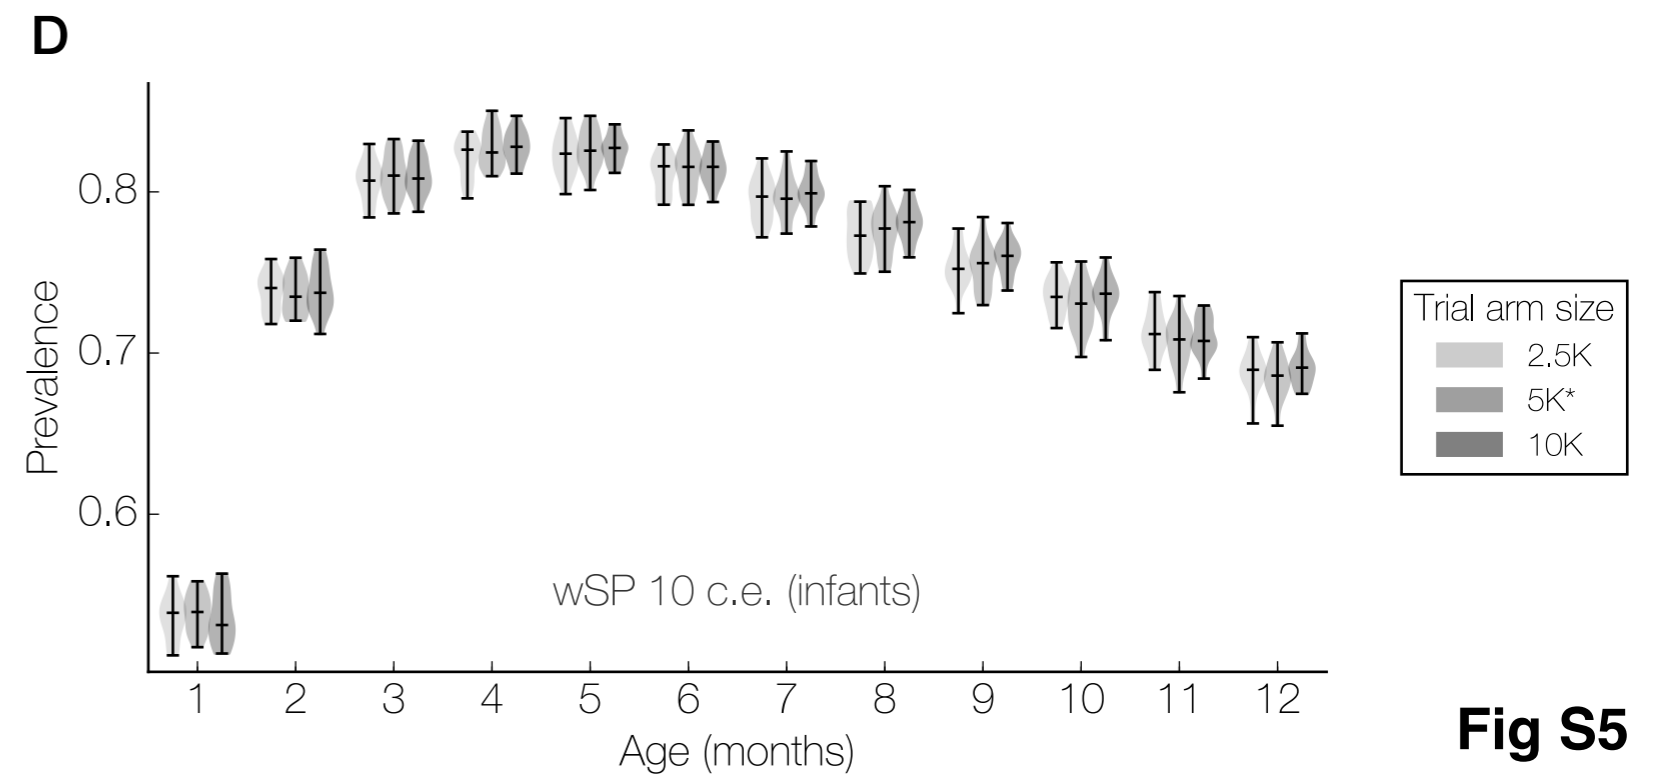

**Fig S5**
